# Supplementary material for: The ISMIP-HOM benchmark experiments performed using the Finite-Element code Elmer
Source: Copernicus journal article supplement (doi:10.5194/tc-2-67-2008), 2008-06-13
Supplement: Supplementary file 1 [file comp_fig_tc_ogtz.pdf › tcd-2007-0018/comp_fig_tc_ogtz.pdf]

# The ISMIP-HOM benchmark experiments performed using the Finite-Element code Elmer.

O. Gagliardini<sup>1</sup> and T. Zwinger<sup>2</sup>

<sup>1</sup>LGGE, CNRS, UJF-Grenoble I, BP 96, F-38402 Saint-Martin d'Hères Cedex, France

<sup>2</sup>CSC-Scientific Computing Ltd., Keilaranta 14, P.O. Box 405, FI-02101 Espoo, Finland

The complementary material attached to the paper *The ISMIP-HOM benchmark experiments performed using the Finite-Element code Elmer* by Gagliardini and Zwinger contains:

- the figures of all the outputs for the 6 ISMIP-HOM experiments performed with Elmer (this pdf file),
- the output data for the 6 ISMIP-HOM experiments performed with Elmer. For each experiments, an output ASCII text file is provided. The name of the file indicates which experiment results it contains, using the following coding: `oga1ELLL.txt`, where

`oga1` is the three letter code of the first author name of this work and the model number, as used in the presentation of the results in Pattyn et al. (2008),

`E` is the experiment number: a, b, c, d, e or f

`LLL` are three numbers denoting the length  $L$  (km) of the domain, *i.e.* 160, 080, 040, 020, 010 or 005. For experiment E, this becomes 000 for the standard non-sliding experiment and 001 for the experiment with the zone with pure sliding. For experiment F, this denotes the slip ratio, *i.e.* 000 or 001. For each experiment, the output variables and their units are given in Table 1.

**Table 1.** Description of the columns of the output files `oga1ELLL.txt` for the different experiments. The number of lines depends on the grid resolution used. The scaled coordinates  $\hat{x} = x/L$  and  $\hat{y} = y/L$  vary between 0 and 1. All variables are taken either at the surface  $z_s$  or at the bed  $z_b$ . The units are  $\text{ma}^{-1}$  for velocity  $u_i$ , kPa for stress  $\tau_{ij}$  and pressure.

| Exp. | File         | 1         | 2          | 3          | 4                | 5                | 6                | 7                | 8                | 9                | 10              |
|------|--------------|-----------|------------|------------|------------------|------------------|------------------|------------------|------------------|------------------|-----------------|
| A    | oga1aLLL.txt | $\hat{x}$ | $\hat{y}$  | $u_x(z_s)$ | $u_y(z_s)$       | $u_z(z_s)$       | $\tau_{xz}(z_b)$ | $\tau_{yz}(z_b)$ | $\Delta p(z_b)$  |                  |                 |
| B    | oga1bLLL.txt | $\hat{x}$ | $u_x(z_s)$ | $u_z(z_s)$ | $\tau_{xz}(z_b)$ | $\Delta p(z_b)$  |                  |                  |                  |                  |                 |
| C    | oga1cLLL.txt | $\hat{x}$ | $\hat{y}$  | $u_x(z_s)$ | $u_y(z_s)$       | $u_z(z_s)$       | $u_x(z_b)$       | $u_y(z_b)$       | $\tau_{xz}(z_b)$ | $\tau_{yz}(z_b)$ | $\Delta p(z_b)$ |
| D    | oga1dLLL.txt | $\hat{x}$ | $u_x(z_s)$ | $u_z(z_s)$ | $u_x(z_b)$       | $\tau_{xz}(z_b)$ | $\Delta p(z_b)$  |                  |                  |                  |                 |
| E    | oga1eLLL.txt | $\hat{x}$ | $u_x(z_s)$ | $u_z(z_s)$ | $\tau_{xz}(z_b)$ | $\Delta p(z_b)$  |                  |                  |                  |                  |                 |
| F    | oga1fLLL.txt | $x$       | $y$        | $z_s$      | $u_x(z_s)$       | $u_y(z_s)$       | $u_z(z_s)$       |                  |                  |                  |                 |

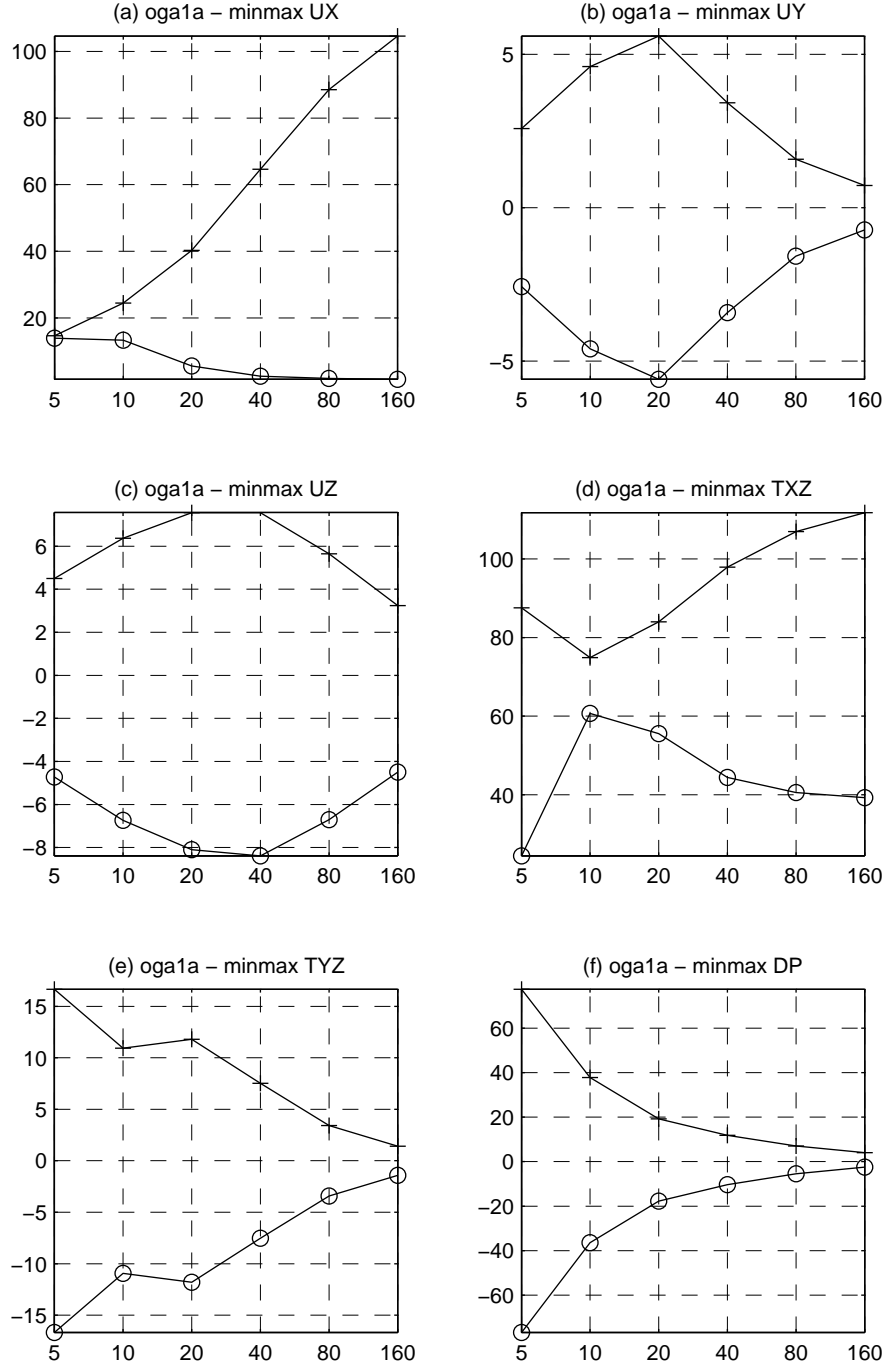

**Fig. 1.** Experiment A - Minimal and maximal values of the horizontal surface velocities **(a)**  $u_x(z_s)$  and **(b)**  $u_y(z_s)$ , **(c)** vertical surface velocity  $u_z(z_s)$ , basal shear stresses **(d)**  $\tau_{xz}(z_b)$  and **(e)**  $\tau_{yz}(z_b)$  and **(f)** the difference between the isotropic and hydrostatic pressure at the bed  $\Delta p(z_b)$  as a function of the domain length  $L$  (km). See Table 1 for the description of the different variables and the units.

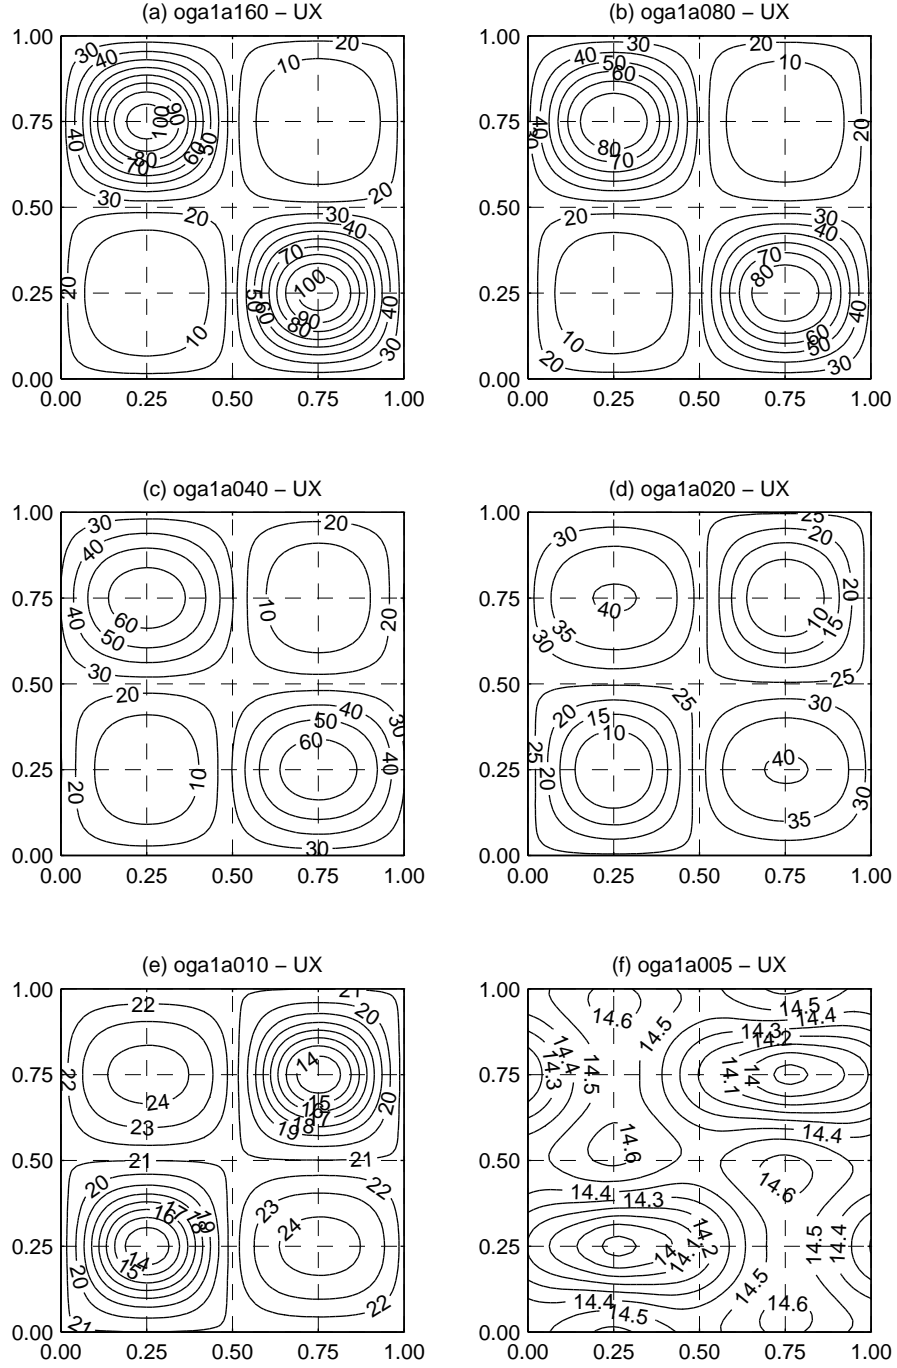

**Fig. 2.** Experiment A - Horizontal surface velocity  $u_x(z_s)$  [ $\text{m s}^{-1}$ ] as a function of the horizontal coordinates  $\hat{x}$  and  $\hat{y}$  for domain lengths (a)  $L = 160$  km, (b)  $L = 80$  km, (c)  $L = 40$  km, (d)  $L = 20$  km, (e)  $L = 10$  km and (f)  $L = 5$  km.

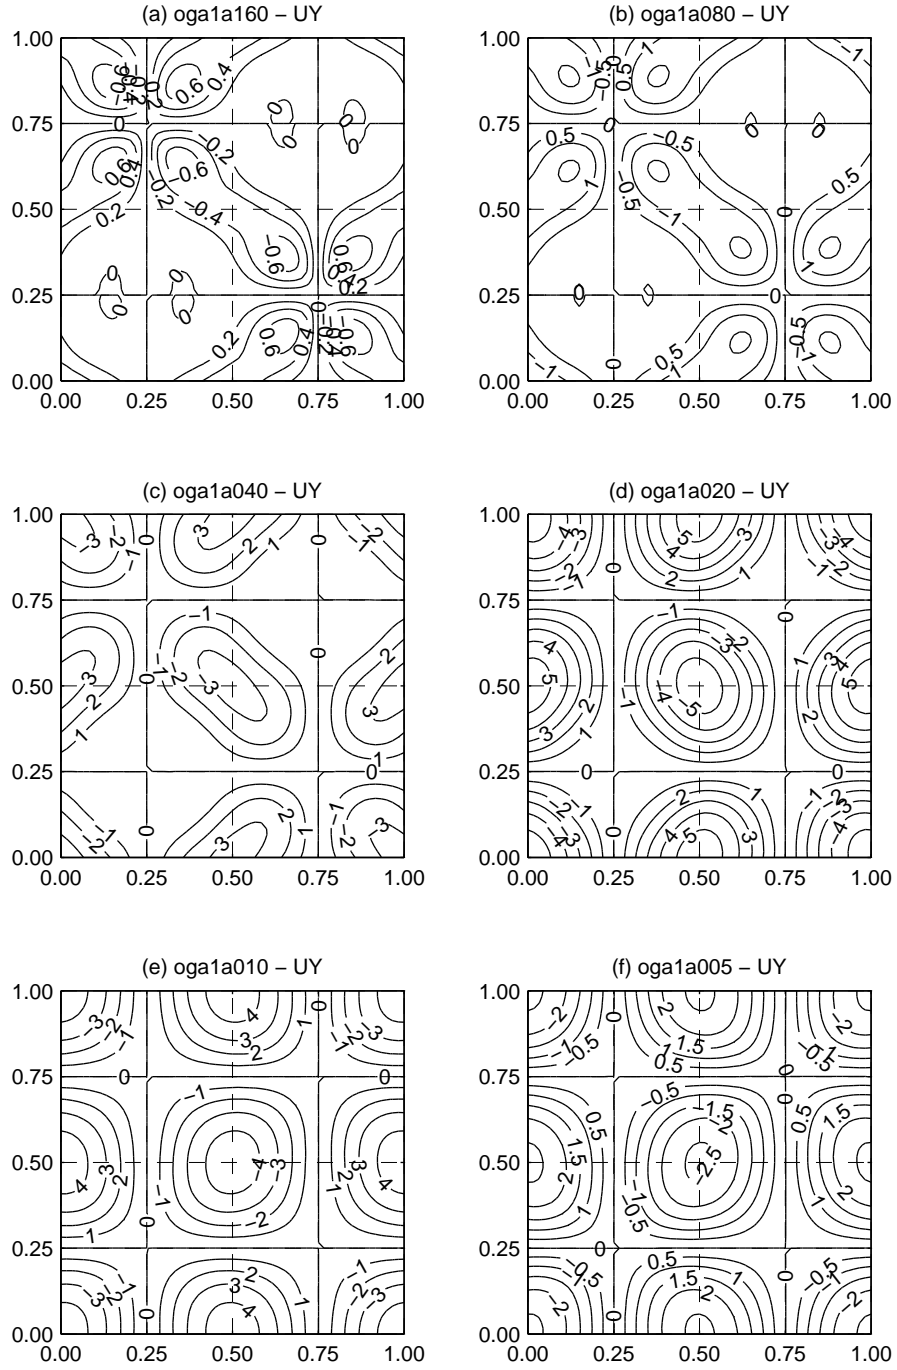

**Fig. 3.** Experiment A - Horizontal surface velocity  $u_y(z_s)$  [ $\text{m s}^{-1}$ ] as a function of the horizontal coordinates  $\hat{x}$  and  $\hat{y}$  for domain lengths (a)  $L = 160$  km, (b)  $L = 80$  km, (c)  $L = 40$  km, (d)  $L = 20$  km, (e)  $L = 10$  km and (f)  $L = 5$  km.

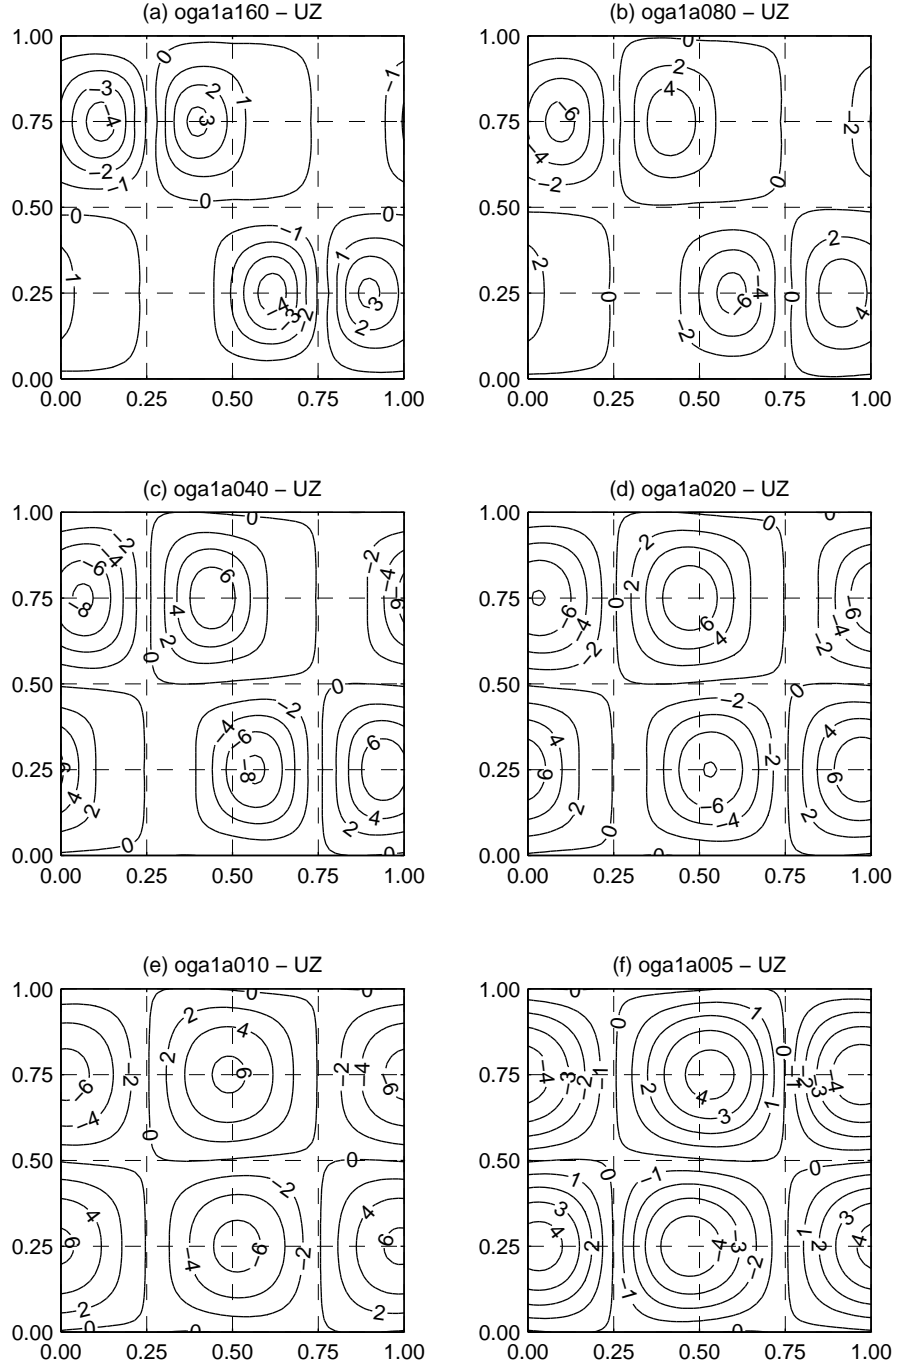

**Fig. 4.** Experiment A - Vertical surface velocity  $u_z(z_s)$  [ $\text{m s}^{-1}$ ] as a function of the horizontal coordinates  $\hat{x}$  and  $\hat{y}$  for domain lengths **(a)**  $L = 160$  km, **(b)**  $L = 80$  km, **(c)**  $L = 40$  km, **(d)**  $L = 20$  km, **(e)**  $L = 10$  km and **(f)**  $L = 5$  km.

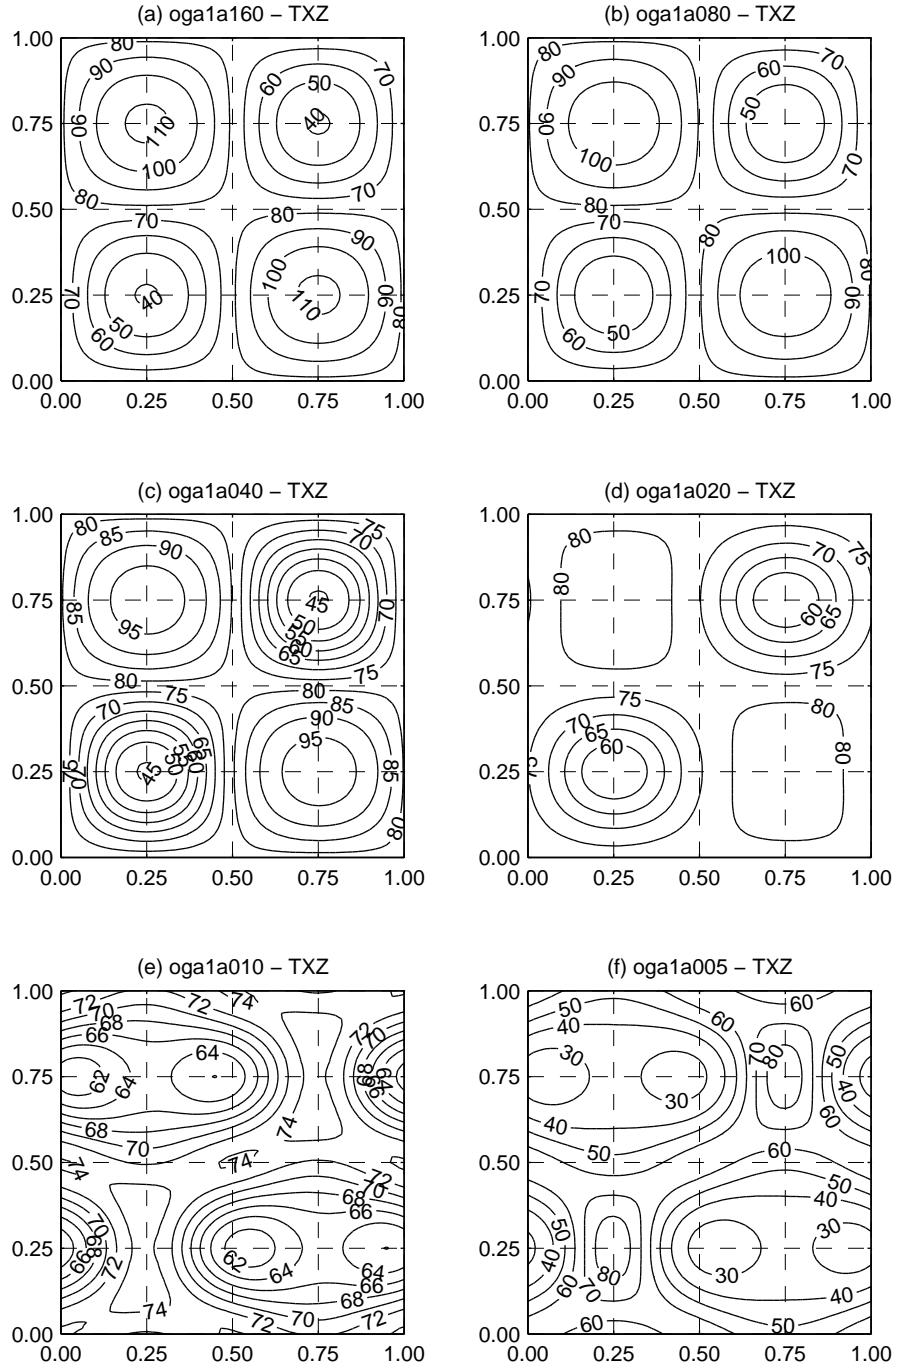

**Fig. 5.** Experiment A - Basal shear stress  $\sigma_{xz}(z_b)$  [kPa] as a function of the horizontal coordinates  $\hat{x}$  and  $\hat{y}$  for domain lengths **(a)**  $L = 160$  km, **(b)**  $L = 80$  km, **(c)**  $L = 40$  km, **(d)**  $L = 20$  km, **(e)**  $L = 10$  km and **(f)**  $L = 5$  km.

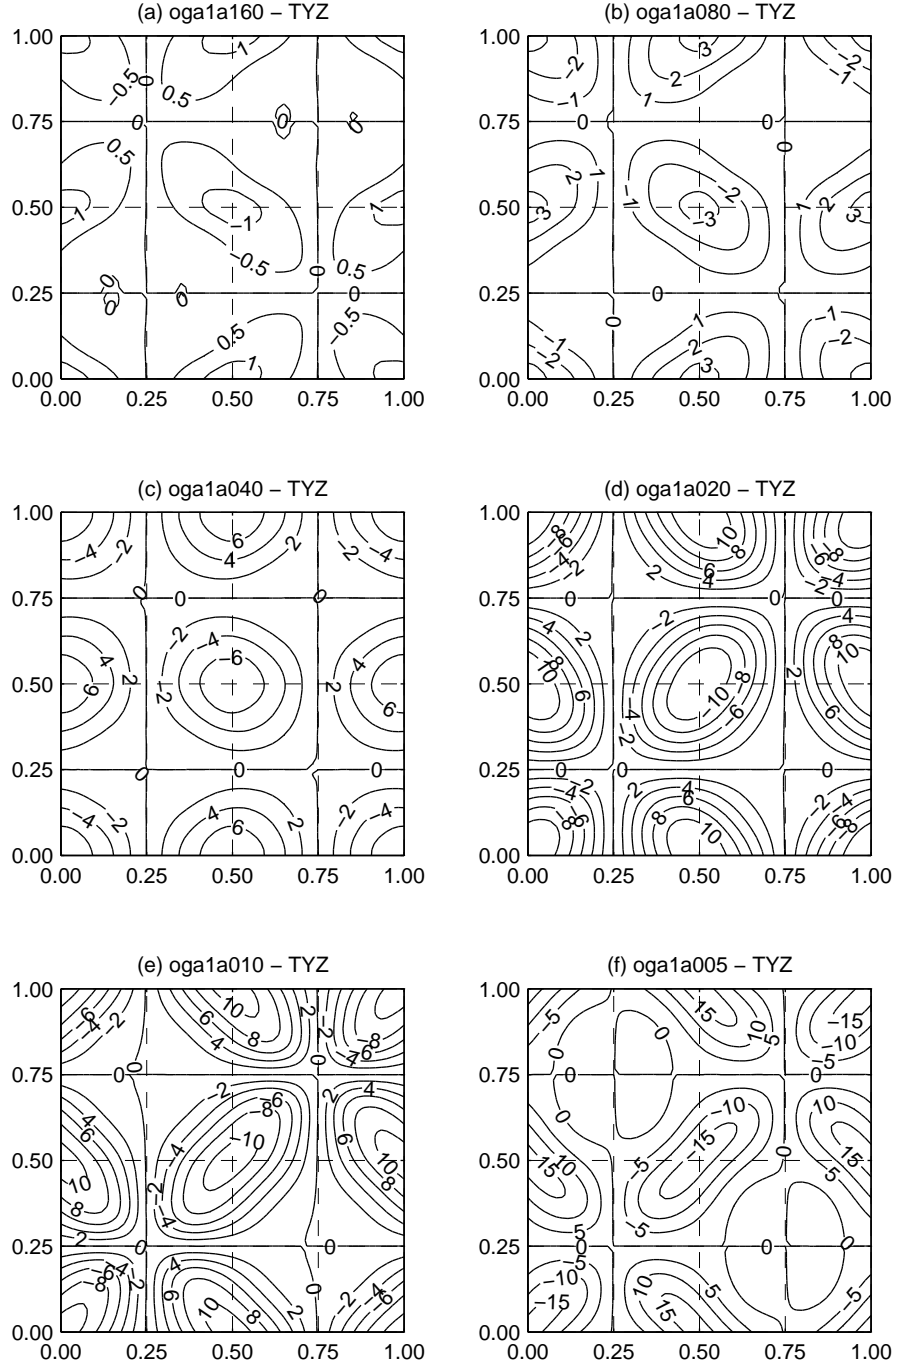

**Fig. 6.** Experiment A - Basal shear stress  $\sigma_{yz}(z_b)$  [kPa] as a function of the horizontal coordinates  $\hat{x}$  and  $\hat{y}$  for domain lengths (a)  $L = 160$  km, (b)  $L = 80$  km, (c)  $L = 40$  km, (d)  $L = 20$  km, (e)  $L = 10$  km and (f)  $L = 5$  km.

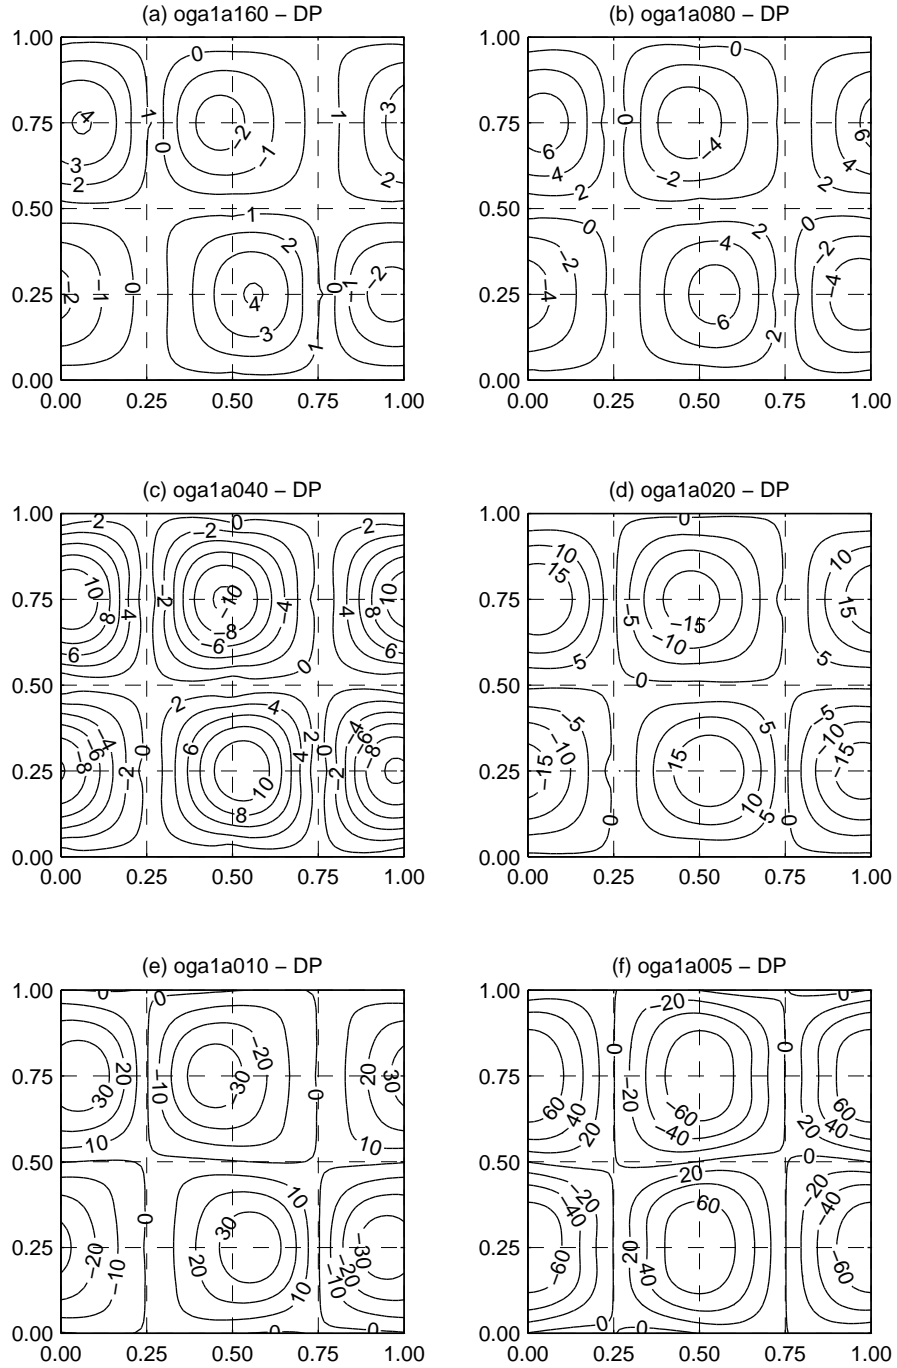

**Fig. 7.** Experiment A - Difference between the isotropic and hydrostatic pressure at the bed  $\Delta p(z_b)$  [kPa] as a function of the horizontal coordinates  $\hat{x}$  and  $\hat{y}$  for domain lengths (a)  $L = 160$  km, (b)  $L = 80$  km, (c)  $L = 40$  km, (d)  $L = 20$  km, (e)  $L = 10$  km and (f)  $L = 5$  km.

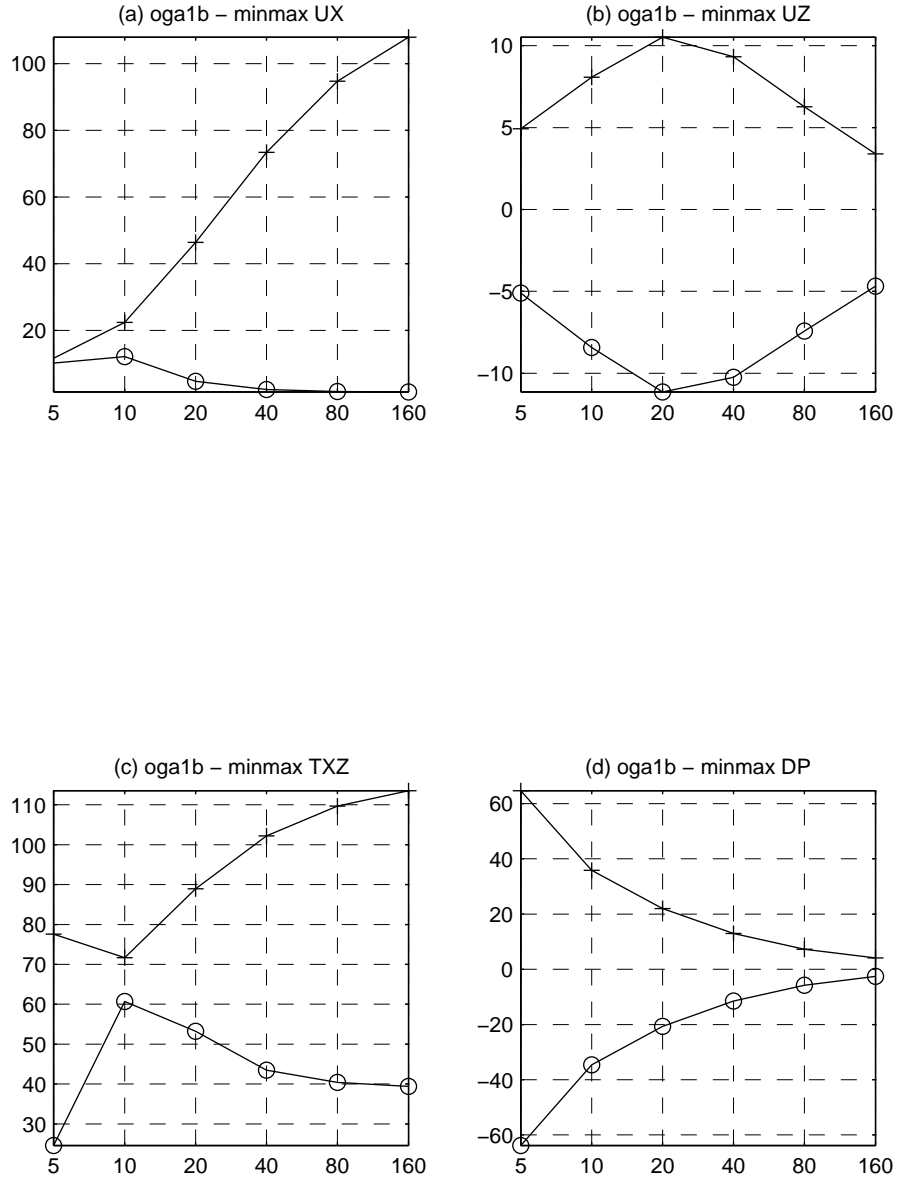

**Fig. 8.** Experiment B - Minimal and maximal values of **(a)** the horizontal surface velocity  $u_x(z_s)$ , **(b)** the vertical surface velocity  $u_z(z_s)$ , **(c)** the basal shear stress  $\tau_{xz}(z_b)$  and the difference between the isotropic and hydrostatic pressure at the bed  $\Delta p(z_b)$  as a function of the domain length  $L$  (km). See Table 1 for the description of the different variables and the units.

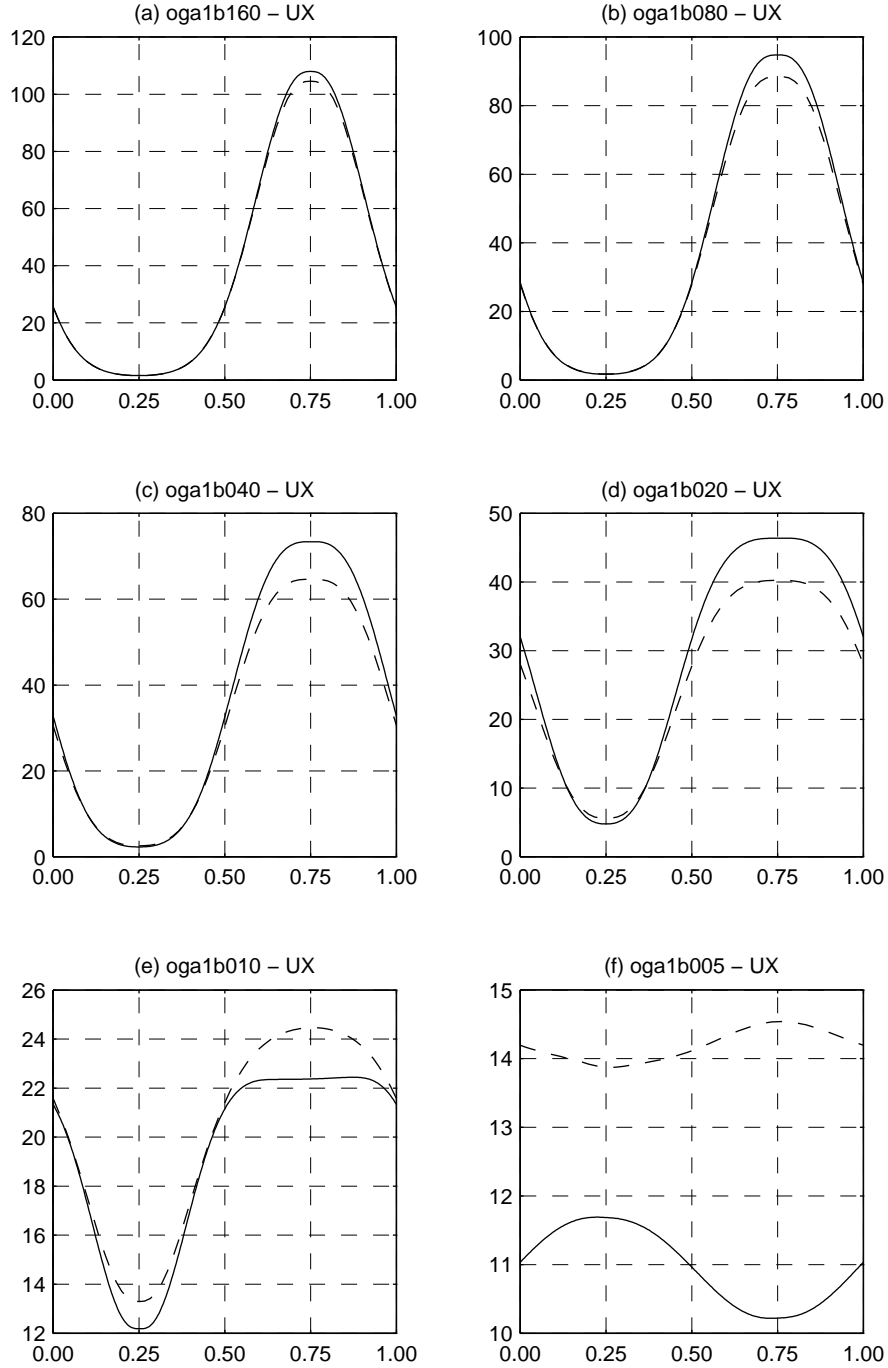

**Fig. 9.** Horizontal surface velocity  $u_x(x, z_s)$  for Experiment B (solid line) and  $u_x(x, L/4, z_s)$  for Experiment A (dashed line) [ $\text{ma}^{-1}$ ] as a function of the  $\hat{x}$  coordinate for domain lengths (a)  $L = 160$  km, (b)  $L = 80$  km, (c)  $L = 40$  km, (d)  $L = 20$  km, (e)  $L = 10$  km and (f)  $L = 5$  km.

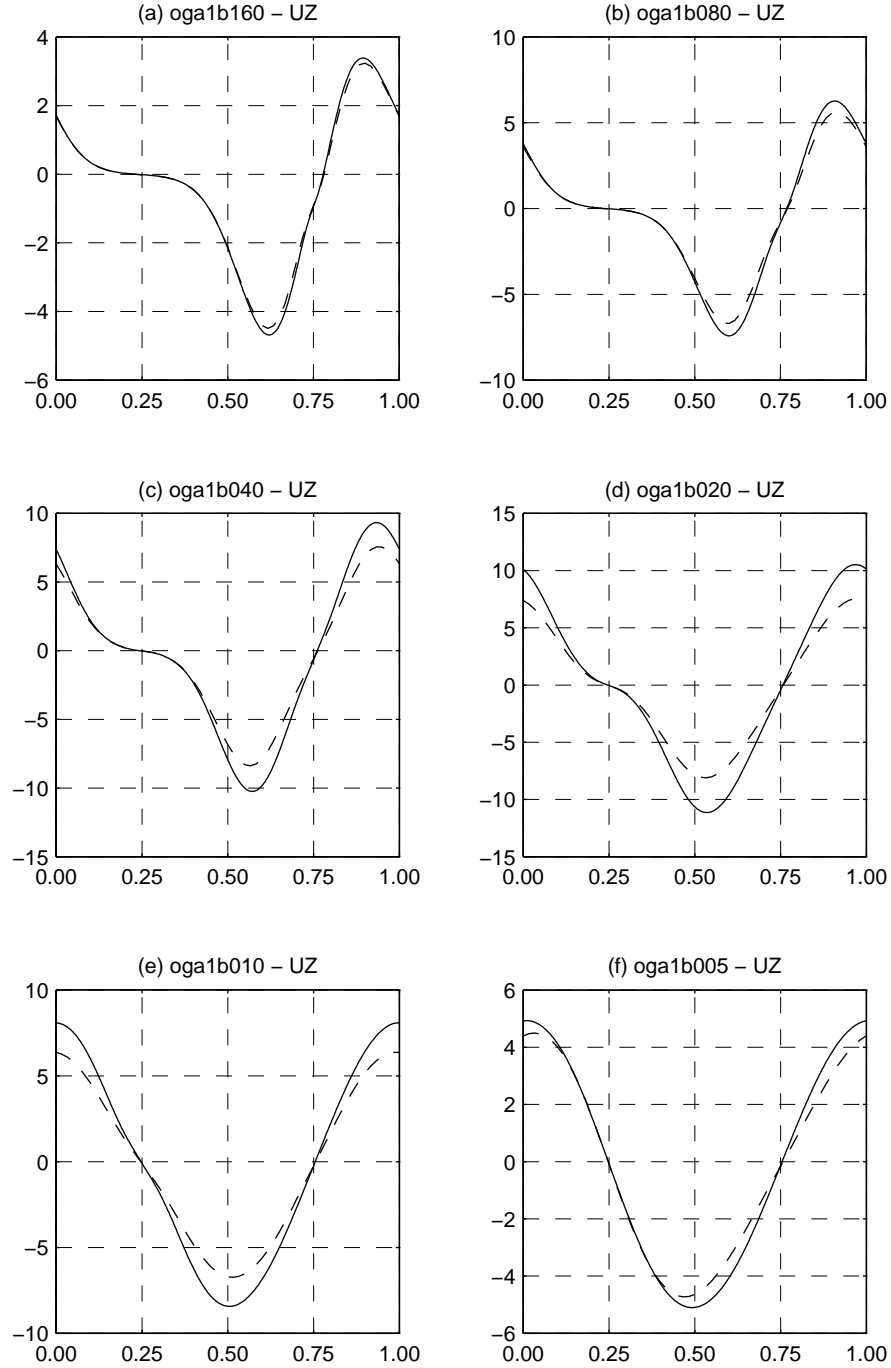

**Fig. 10.** Vertical surface velocity  $u_z(x, z_s)$  for Experiment B (solid line) and  $u_z(x, L/4, z_s)$  for Experiment A (dashed line) [ $\text{m a}^{-1}$ ] as a function of the  $\hat{x}$  coordinate for domain lengths (a)  $L = 160$  km, (b)  $L = 80$  km, (c)  $L = 40$  km, (d)  $L = 20$  km, (e)  $L = 10$  km and (f)  $L = 5$  km.

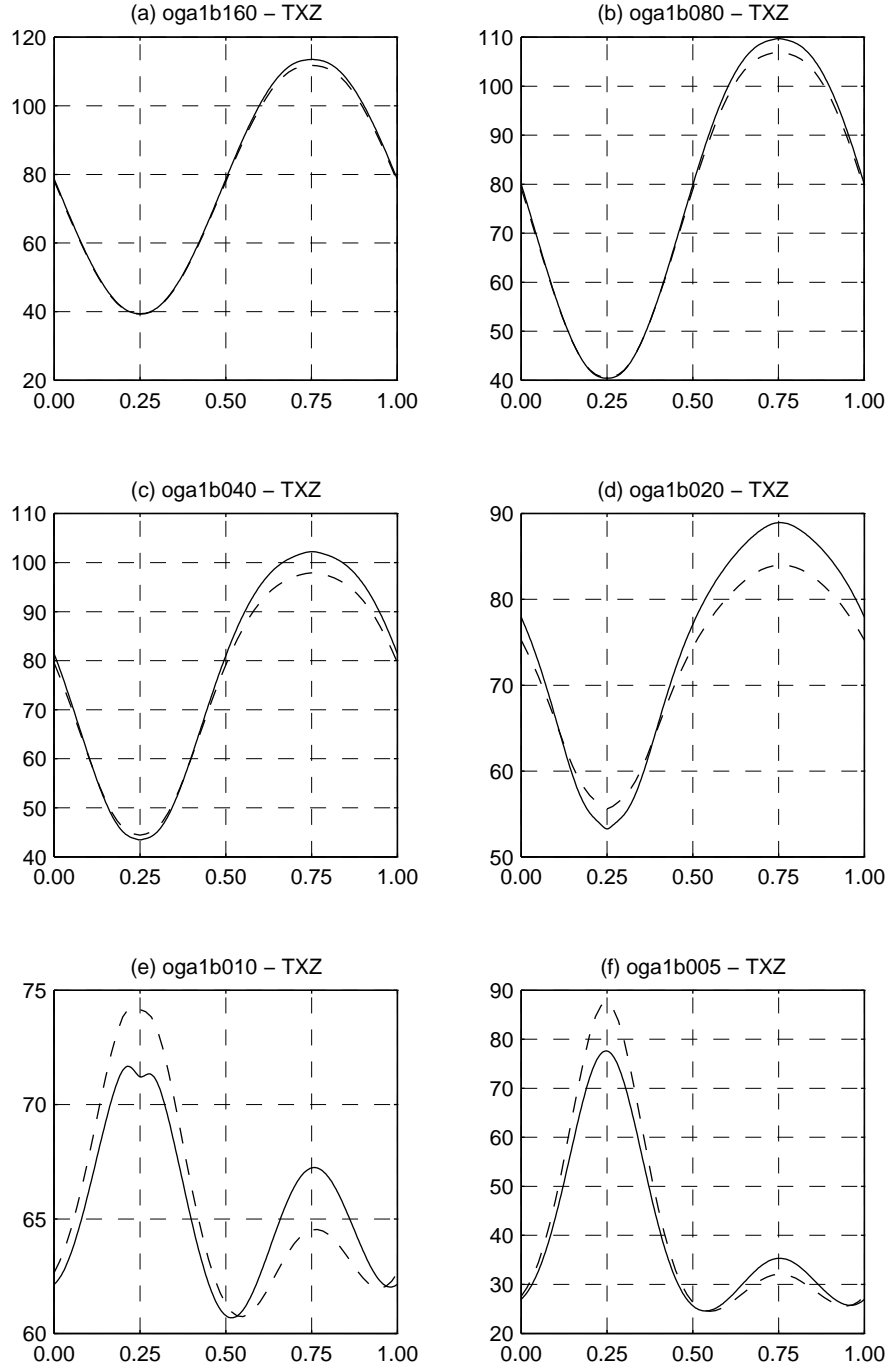

**Fig. 11.** Basal shear stress  $\sigma_{xz}(x, z_s)$  for Experiment B (solid line) and  $\sigma_{xz}(x, L/4, z_s)$  for Experiment A (dashed line) [kPa] as a function of the  $\hat{x}$  coordinate for domain lengths **(a)**  $L = 160$  km, **(b)**  $L = 80$  km, **(c)**  $L = 40$  km, **(d)**  $L = 20$  km, **(e)**  $L = 10$  km and **(f)**  $L = 5$  km.

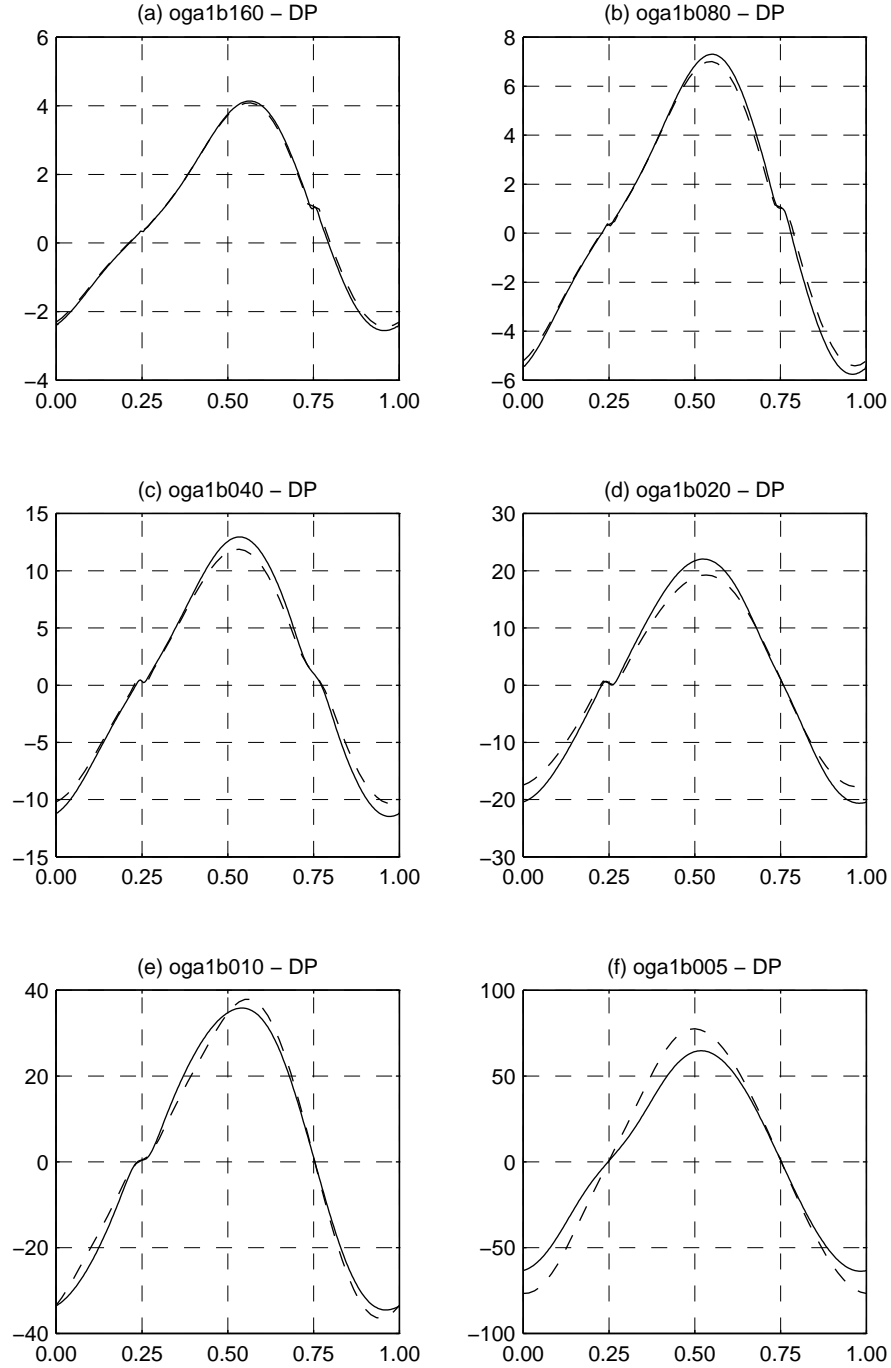

**Fig. 12.** Difference between the isotropic and hydrostatic pressure at the bed  $\Delta p(x, z_s)$  for Experiment B (solid line) and  $\Delta p(x, L/4, z_s)$  for Experiment A (dashed line) [kPa] as a function of the  $\hat{x}$  coordinate for domain lengths **(a)**  $L = 160$  km, **(b)**  $L = 80$  km, **(c)**  $L = 40$  km, **(d)**  $L = 20$  km, **(e)**  $L = 10$  km and **(f)**  $L = 5$  km.

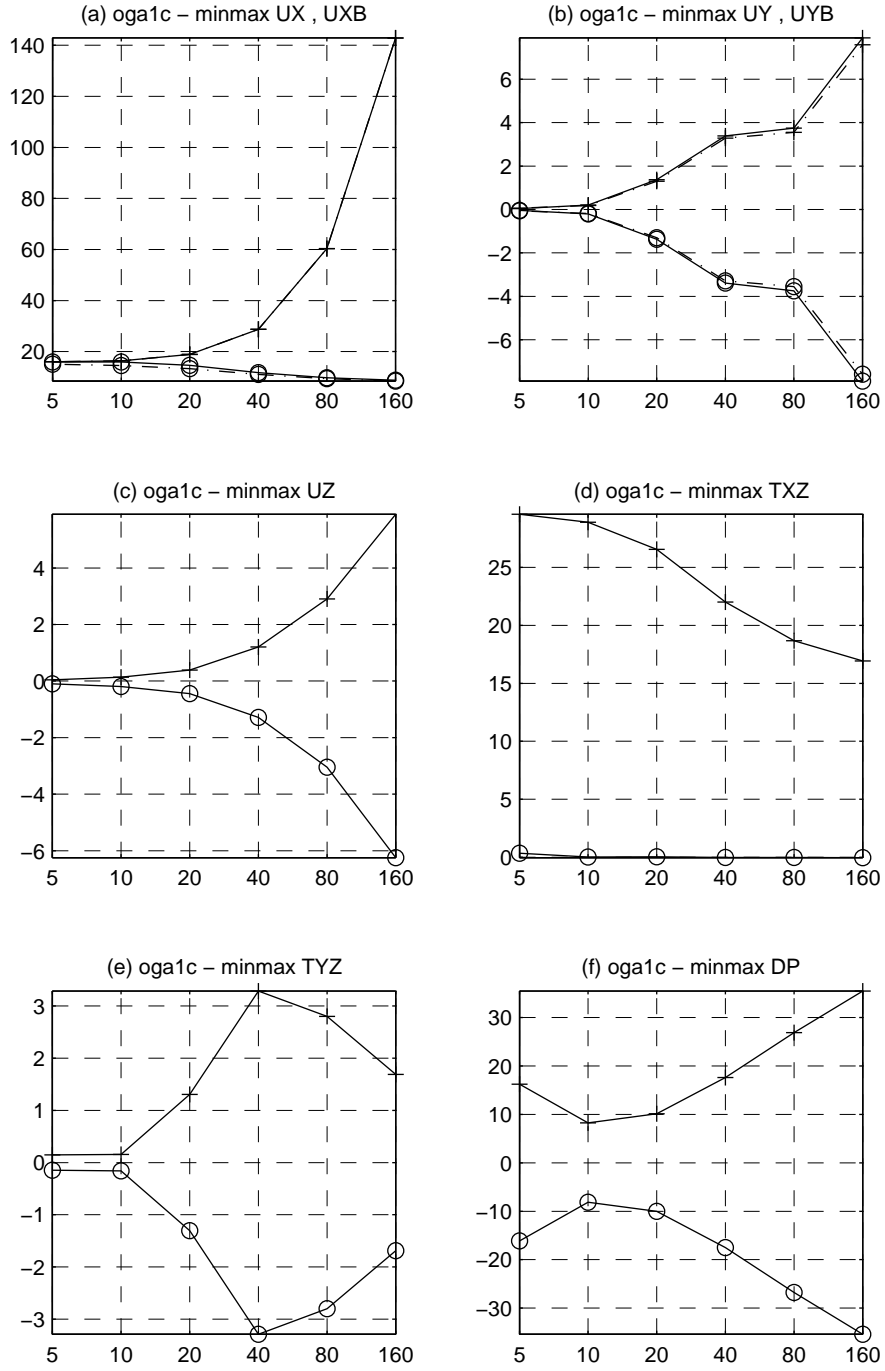

**Fig. 13.** Experiment C - Minimal and maximal values of the horizontal velocities **(a)**  $u_x(z_s)$ ,  $u_x(z_b)$  and **(b)**  $u_y(z_s)$ ,  $u_y(z_b)$  (with line at the surface and dashed line at the base), **(c)** the vertical surface velocity  $u_z(z_s)$ , the shear stresses **(d)**  $\tau_{xz}(z_b)$  and **(e)**  $\tau_{yz}(z_b)$  and **(f)** the difference between the isotropic and hydrostatic pressure at the bed  $\Delta p(z_b)$  as a function of the domain length  $L$  (km). See Table 1 for the description of the different variables and the units.

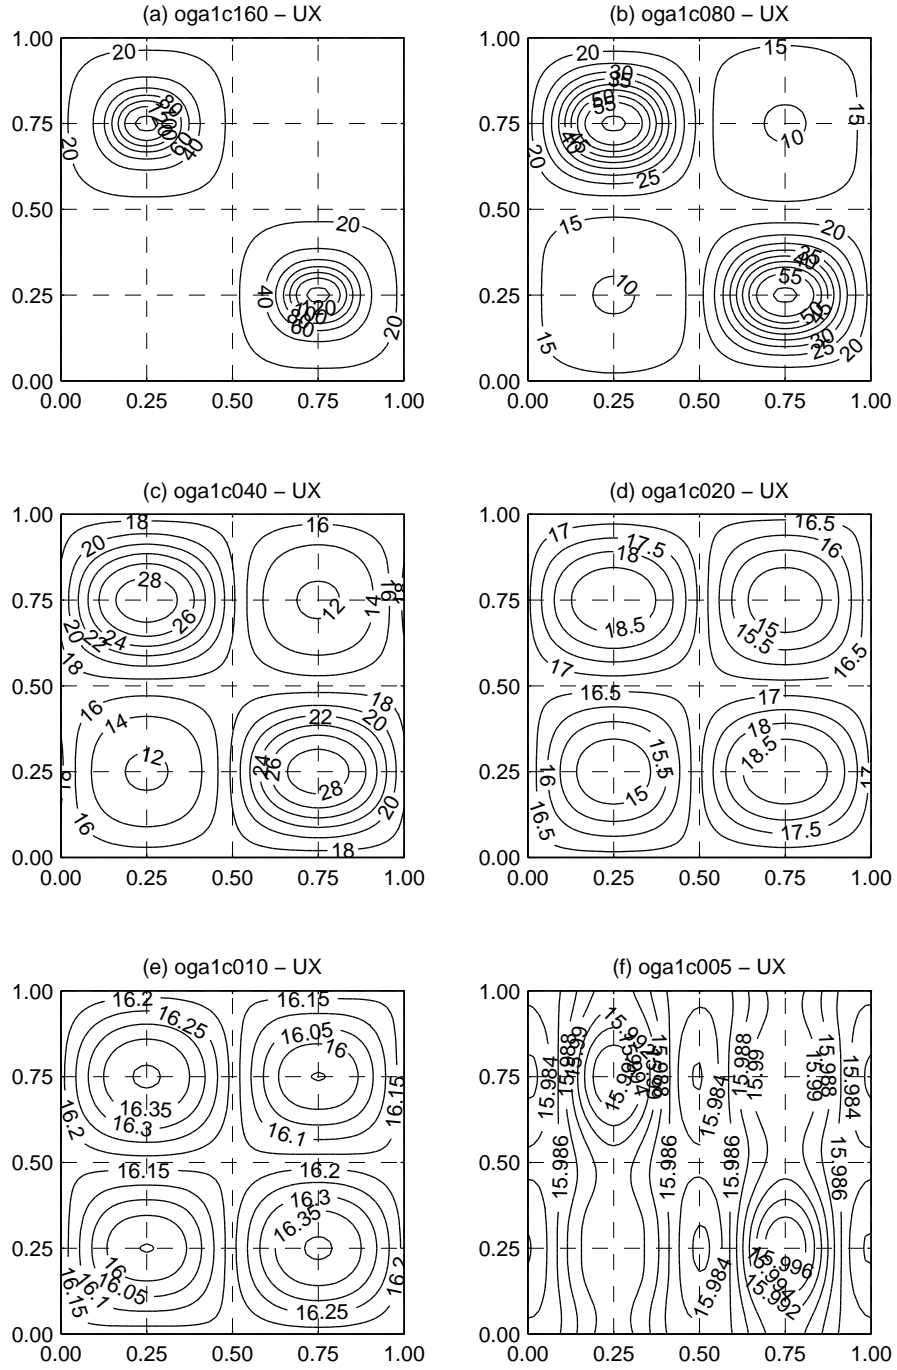

**Fig. 14.** Experiment C - Horizontal surface velocity  $u_x(z_s)$  [ $\text{ma}^{-1}$ ] as a function of the horizontal coordinates  $\hat{x}$  and  $\hat{y}$  for domain lengths (a)  $L = 160$  km, (b)  $L = 80$  km, (c)  $L = 40$  km, (d)  $L = 20$  km, (e)  $L = 10$  km and (f)  $L = 5$  km.

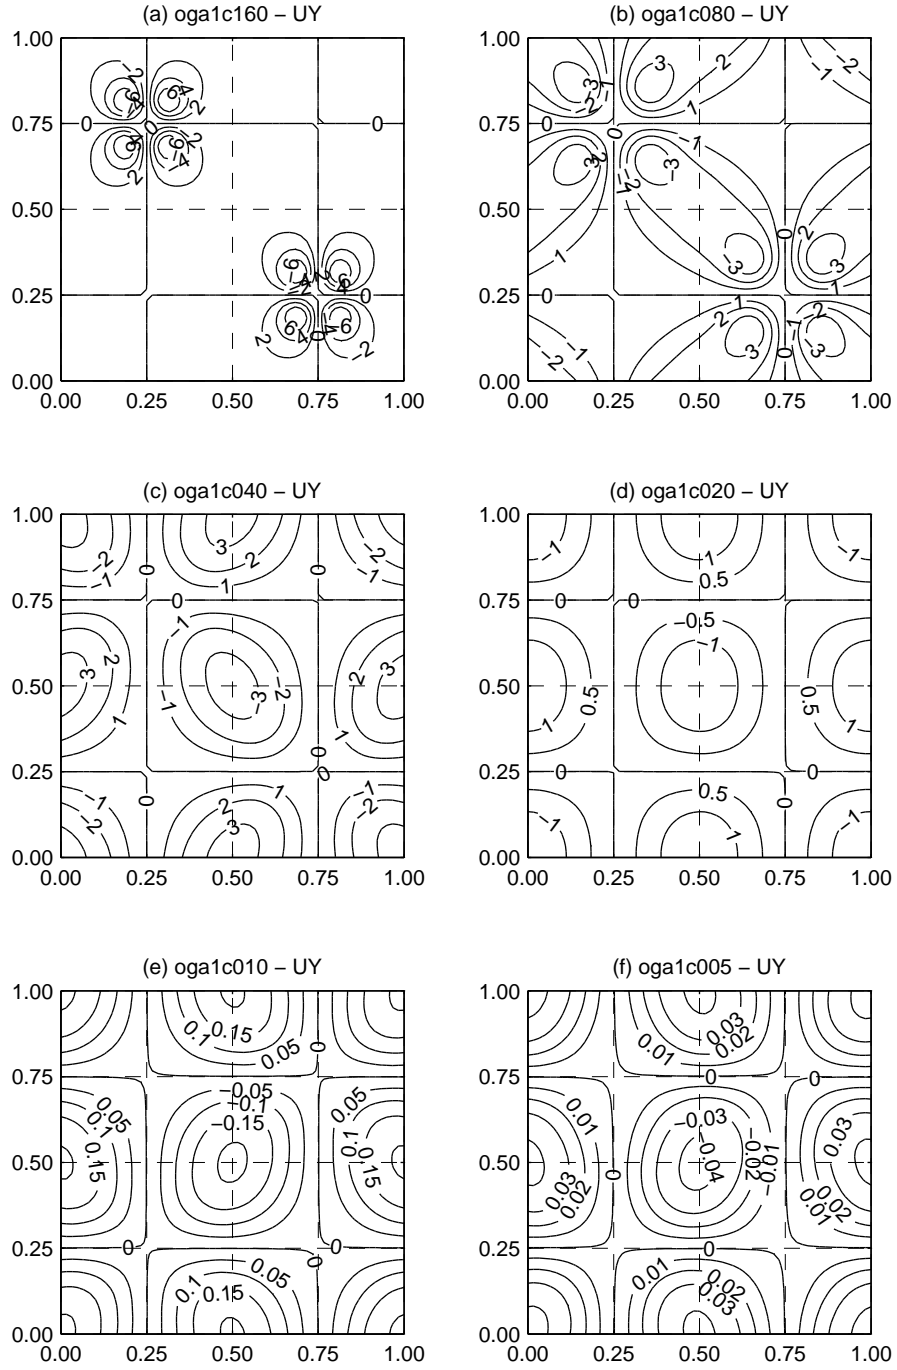

**Fig. 15.** Experiment C - Horizontal surface velocity  $u_y(z_s)$  [ $\text{ma}^{-1}$ ] as a function of the horizontal coordinates  $\hat{x}$  and  $\hat{y}$  for domain lengths (a)  $L = 160$  km, (b)  $L = 80$  km, (c)  $L = 40$  km, (d)  $L = 20$  km, (e)  $L = 10$  km and (f)  $L = 5$  km.

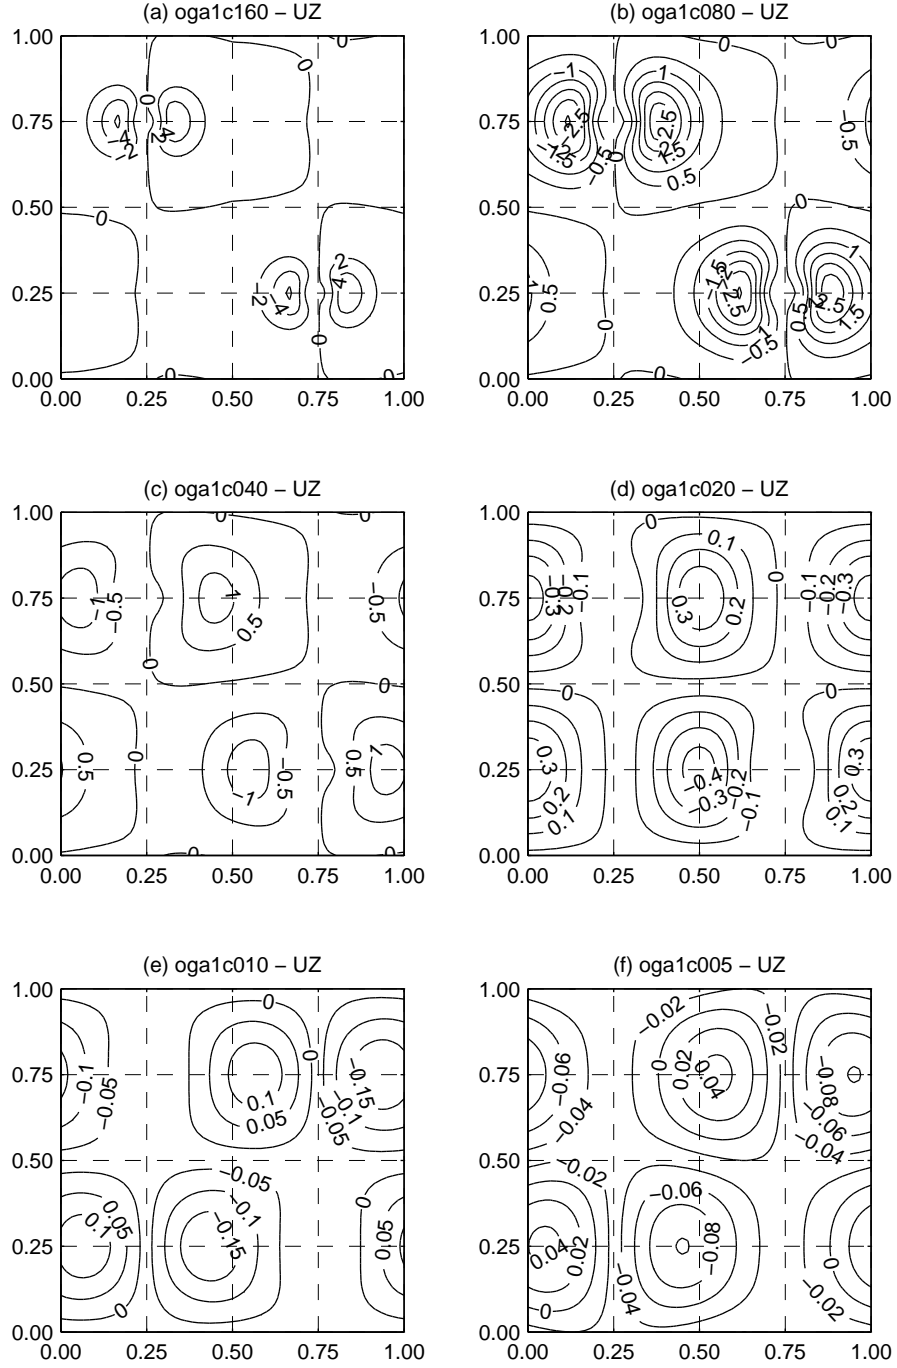

**Fig. 16.** Experiment C - Vertical surface velocity  $u_z(z_s)$  [ $\text{ma}^{-1}$ ] as a function of the horizontal coordinates  $\hat{x}$  and  $\hat{y}$  for domain lengths (a)  $L = 160$  km, (b)  $L = 80$  km, (c)  $L = 40$  km, (d)  $L = 20$  km, (e)  $L = 10$  km and (f)  $L = 5$  km.

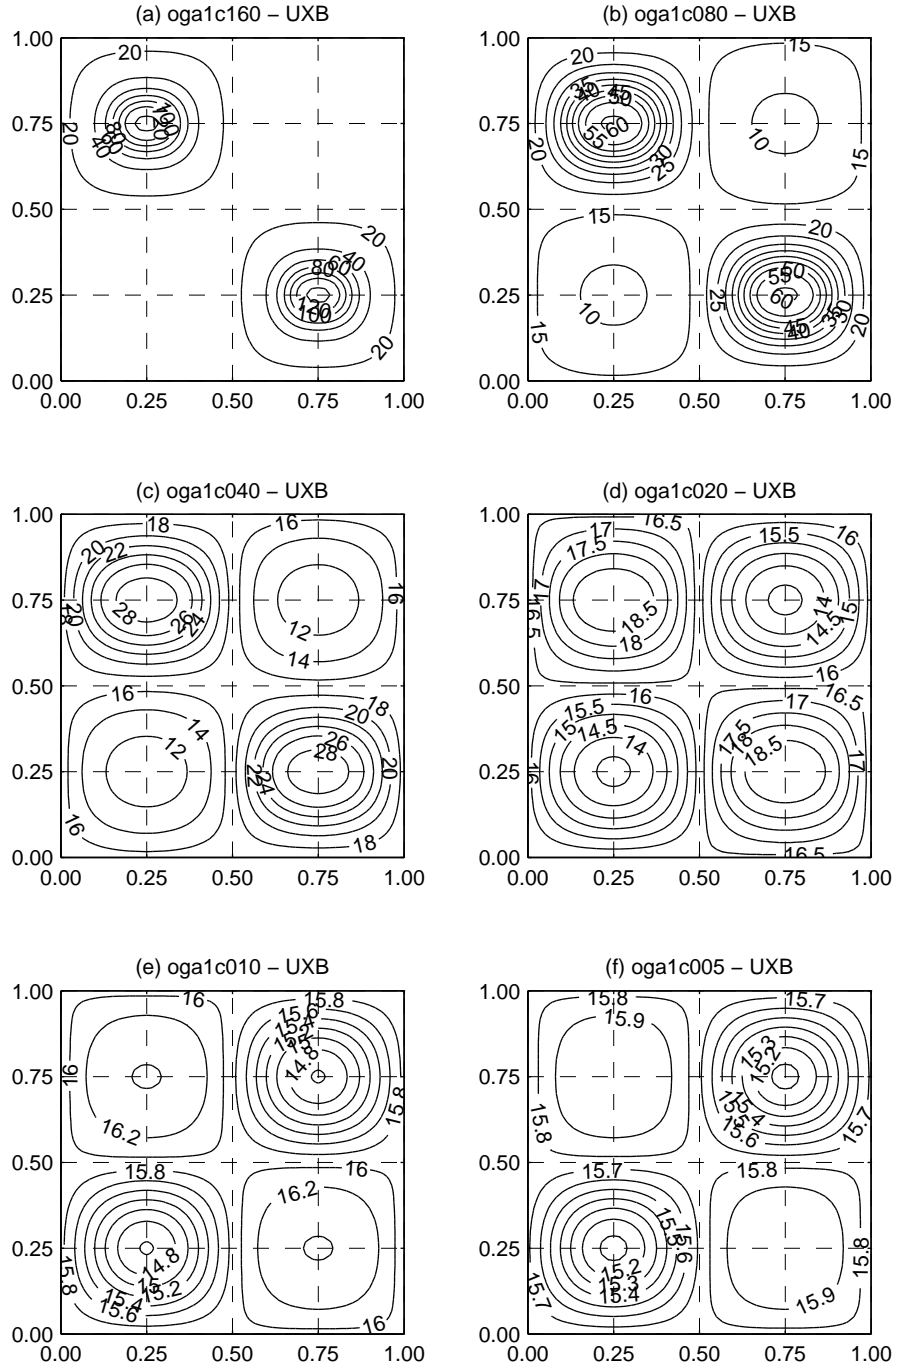

**Fig. 17.** Experiment C - Horizontal bed velocity  $u_x(z_b)$  [ $\text{ma}^{-1}$ ] as a function of the horizontal coordinates  $\hat{x}$  and  $\hat{y}$  for domain lengths (a)  $L = 160$  km, (b)  $L = 80$  km, (c)  $L = 40$  km, (d)  $L = 20$  km, (e)  $L = 10$  km and (f)  $L = 5$  km.

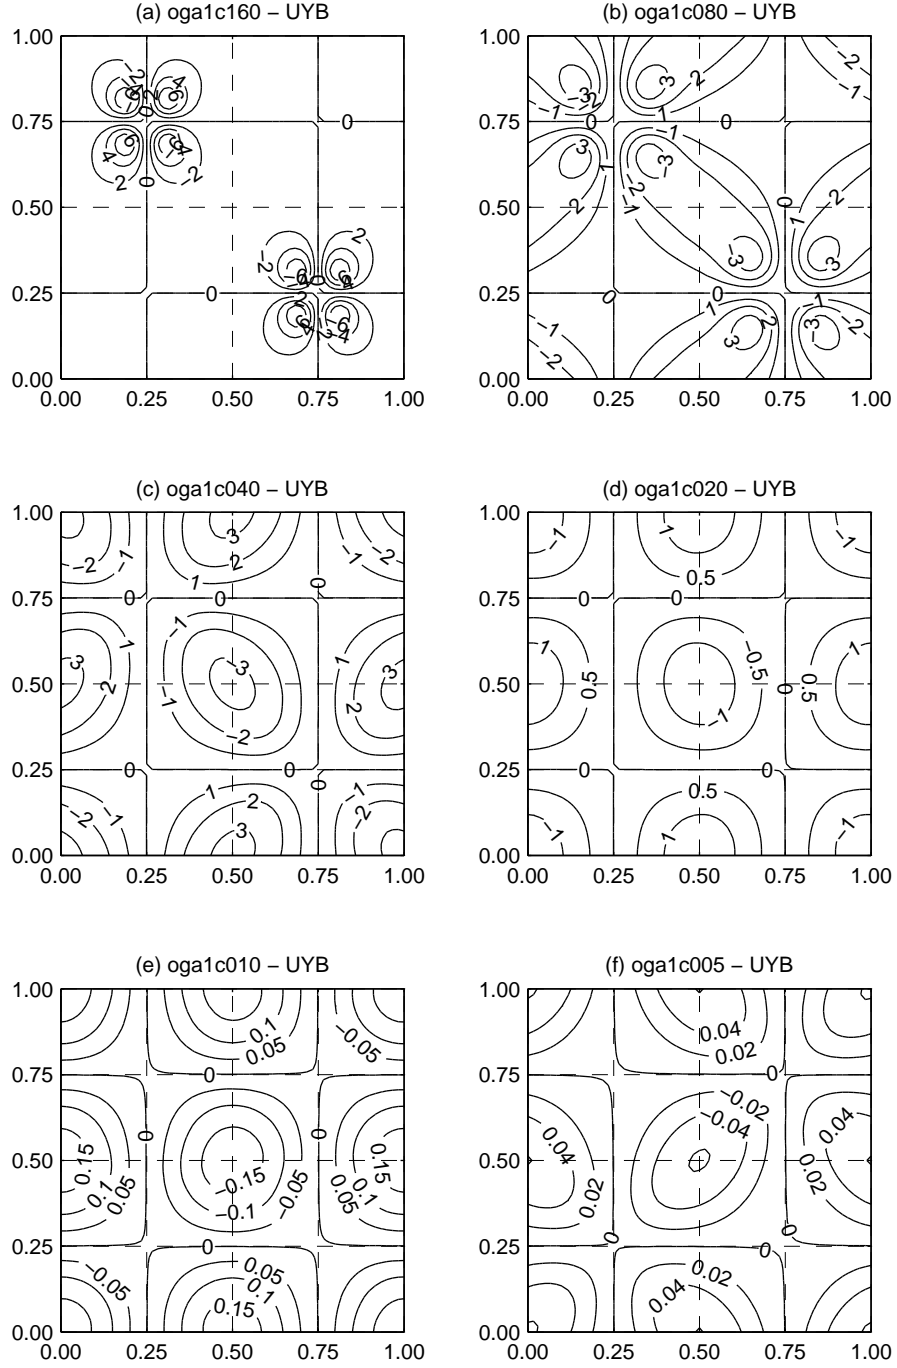

**Fig. 18.** Experiment C - Horizontal bed velocity  $u_y(z_b)$  [ $\text{m a}^{-1}$ ] as a function of the horizontal coordinates  $\hat{x}$  and  $\hat{y}$  for domain lengths **(a)**  $L = 160$  km, **(b)**  $L = 80$  km, **(c)**  $L = 40$  km, **(d)**  $L = 20$  km, **(e)**  $L = 10$  km and **(f)**  $L = 5$  km.

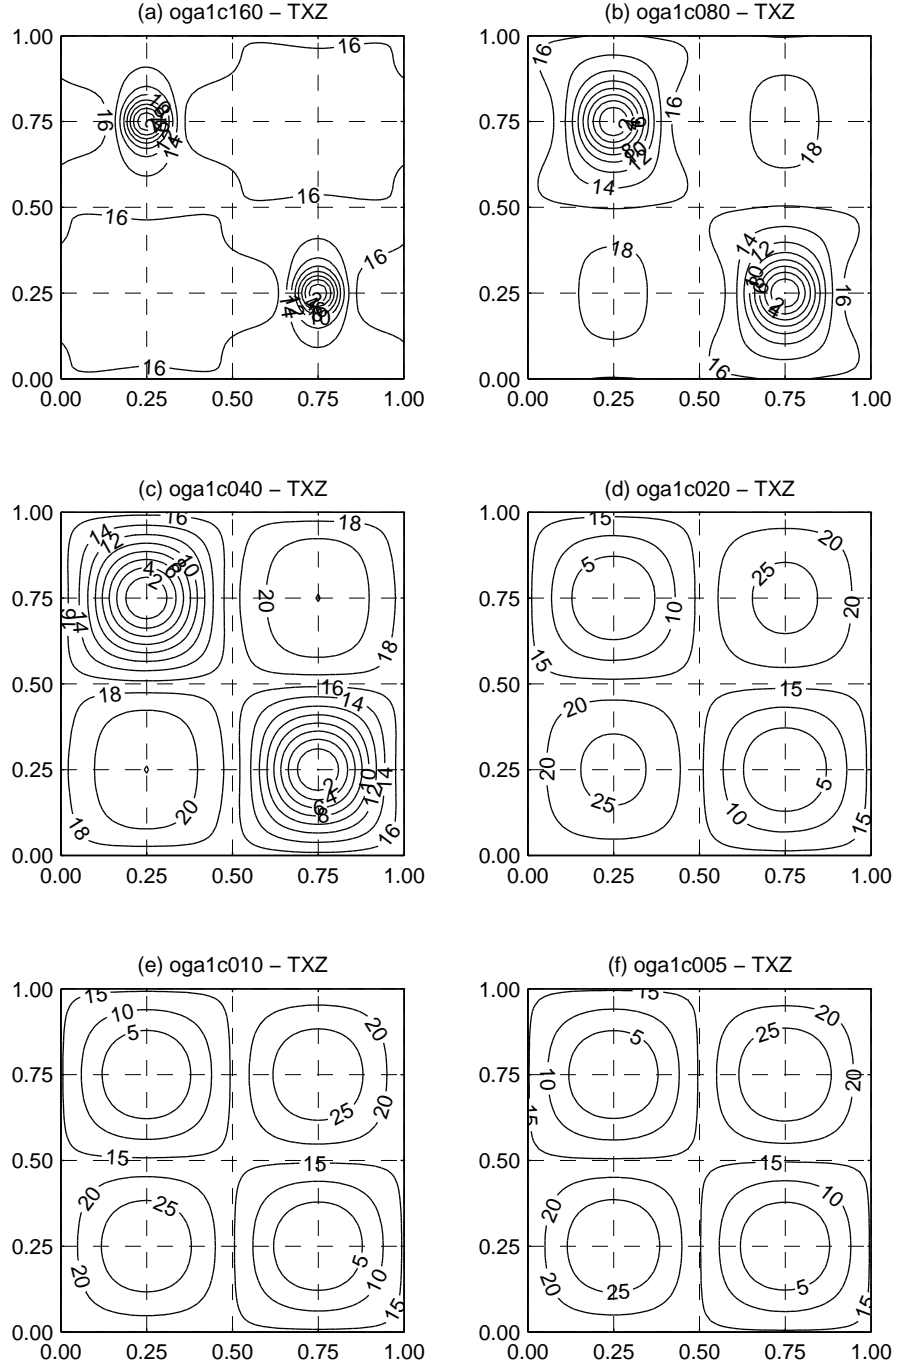

**Fig. 19.** Experiment C - Basal shear stress  $\sigma_{xz}(z_b)$  [kPa] as a function of the horizontal coordinates  $\hat{x}$  and  $\hat{y}$  for domain lengths (a)  $L = 160$  km, (b)  $L = 80$  km, (c)  $L = 40$  km, (d)  $L = 20$  km, (e)  $L = 10$  km and (f)  $L = 5$  km.

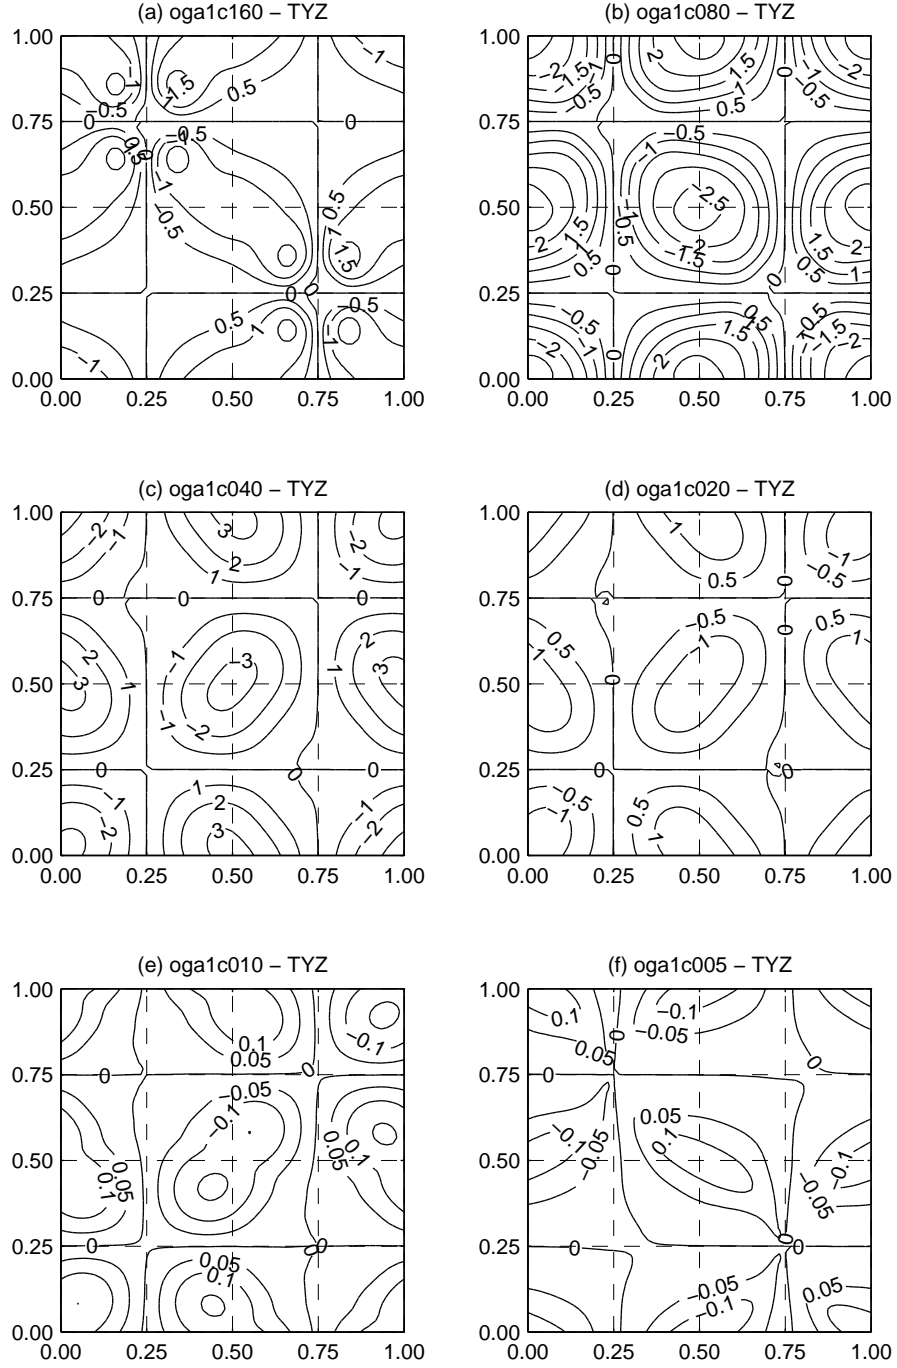

**Fig. 20.** Experiment C - Basal shear stress  $\sigma_{yz}(z_b)$  [kPa] as a function of the horizontal coordinates  $\hat{x}$  and  $\hat{y}$  for domain lengths (a)  $L = 160$  km, (b)  $L = 80$  km, (c)  $L = 40$  km, (d)  $L = 20$  km, (e)  $L = 10$  km and (f)  $L = 5$  km.

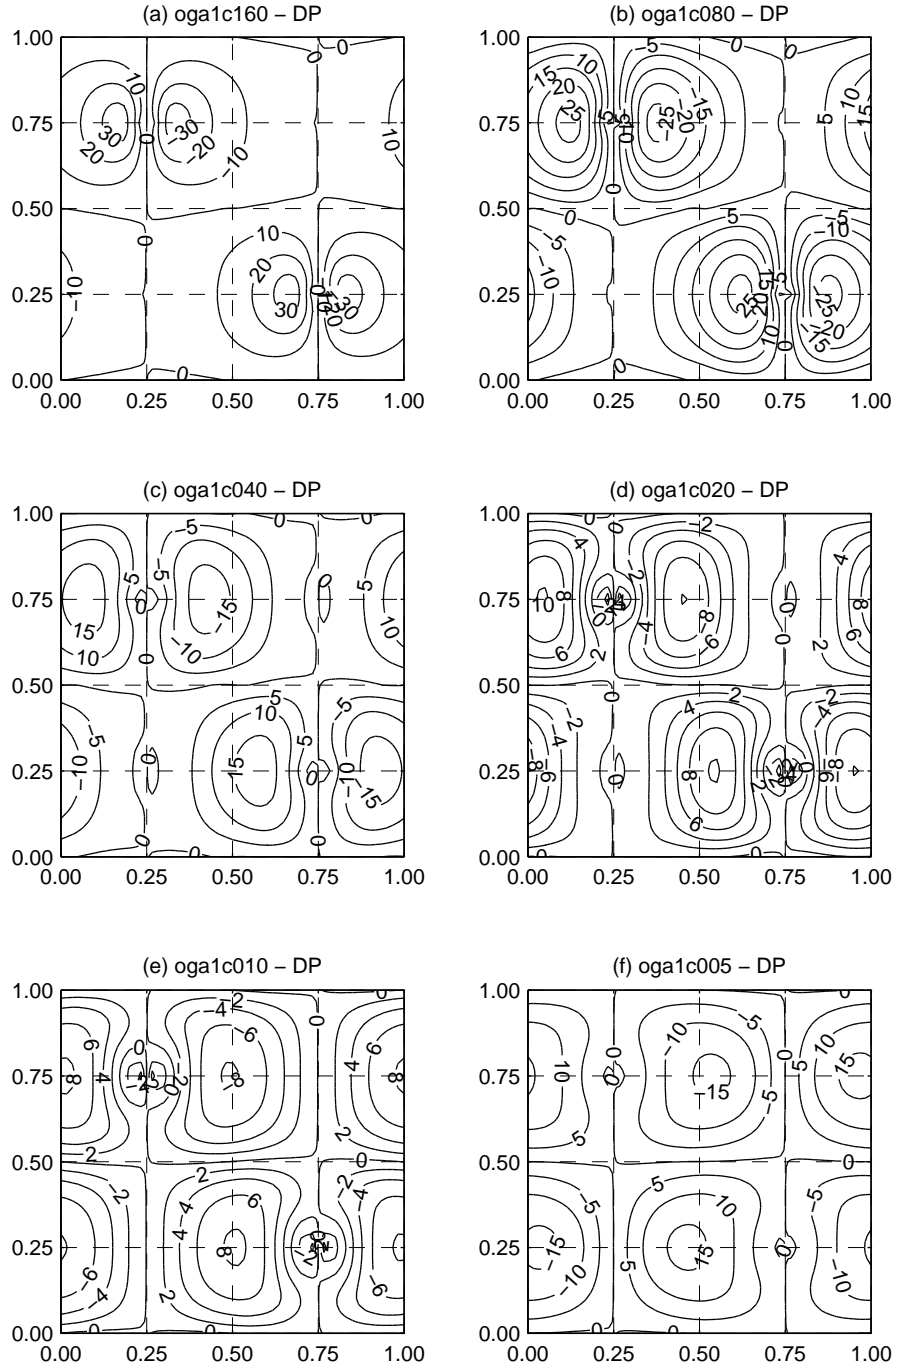

**Fig. 21.** Experiment C - Difference between the isotropic and hydrostatic pressure at the bed  $\Delta p(z_b)$  [kPa] as a function of the horizontal coordinates  $\hat{x}$  and  $\hat{y}$  for domain lengths (a)  $L = 160$  km, (b)  $L = 80$  km, (c)  $L = 40$  km, (d)  $L = 20$  km, (e)  $L = 10$  km and (f)  $L = 5$  km.

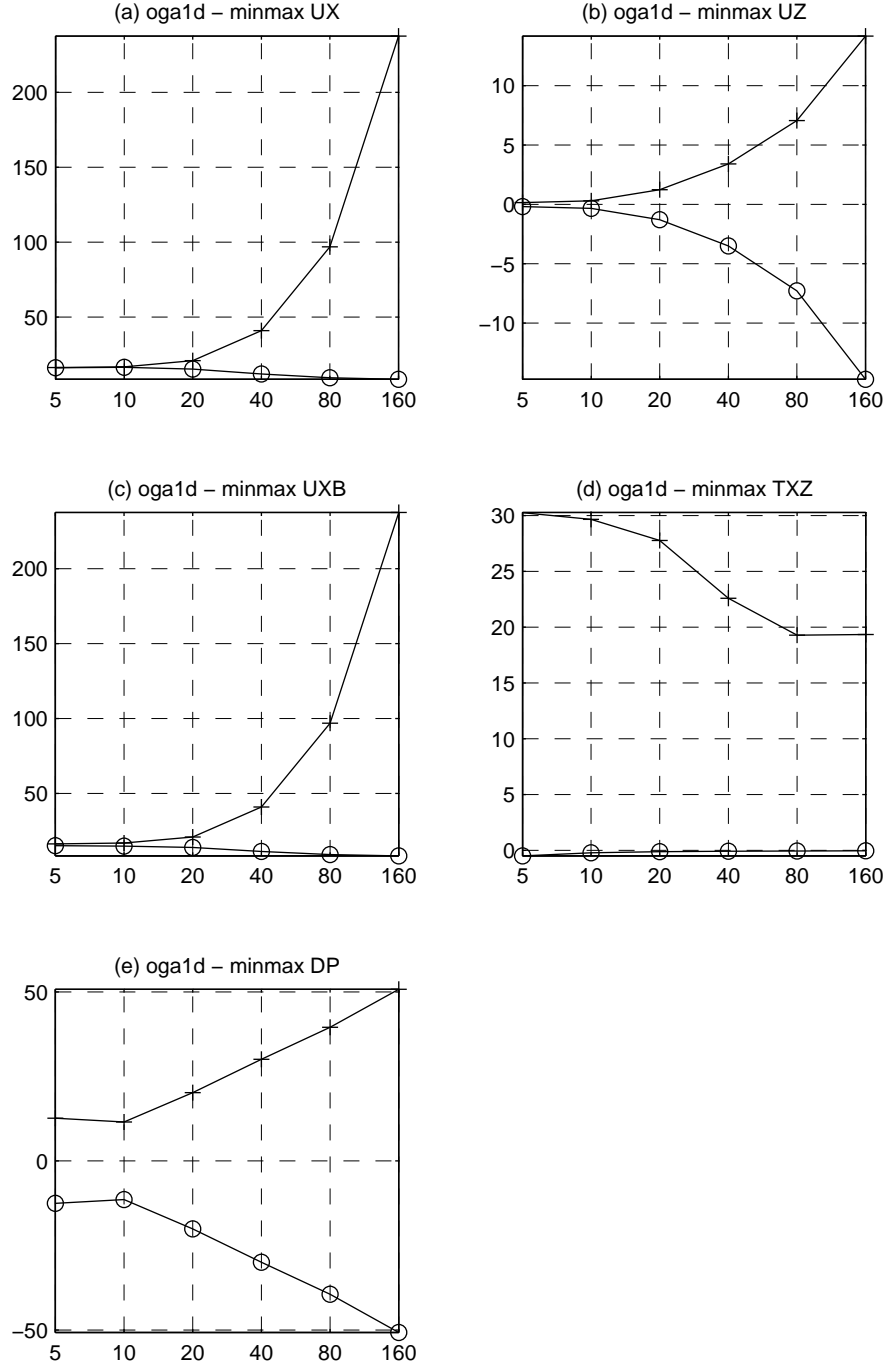

**Fig. 22.** Experiment D - Minimal and maximal values of (a) the horizontal surface velocity  $u_x(z_s)$ , (b) the vertical surface velocity  $u_z(z_s)$ , (c) the horizontal bottom velocity  $u_x(z_b)$ , (d) the basal shear stress  $\tau_{xz}(z_b)$  and (e) the difference between the isotropic and hydrostatic pressure at the bed  $\Delta p(z_b)$  as a function of the domain length  $L$  (km). See Table 1 for the description of the different variables and the units.

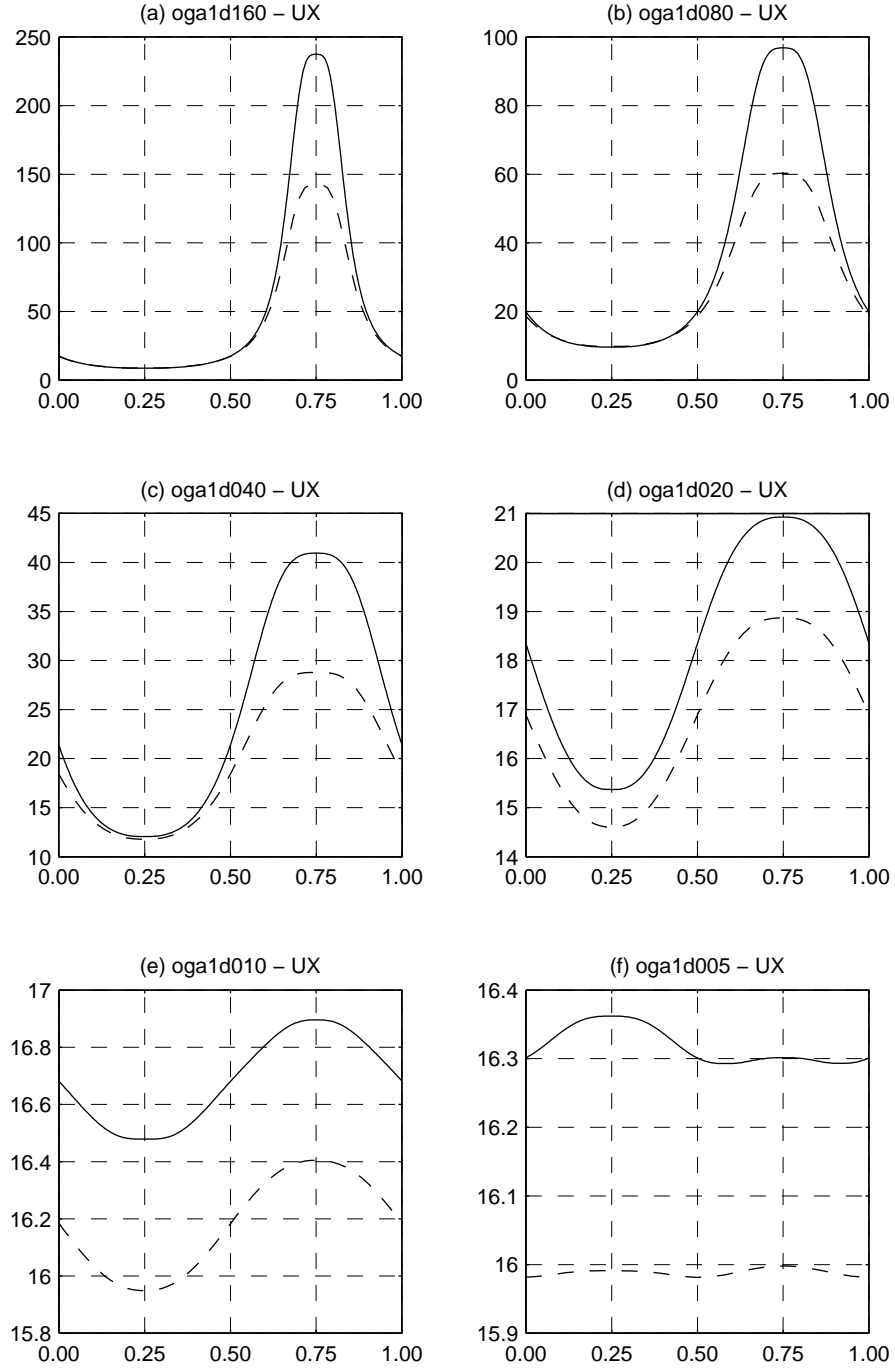

**Fig. 23.** Horizontal surface velocity  $u_x(x, z_s)$  for Experiment D (solid line) and  $u_x(x, L/4, z_s)$  for experiment C (dashed line) [ $\text{ma}^{-1}$ ] as a function of the  $\hat{x}$  coordinate for domain lengths (a)  $L = 160$  km, (b)  $L = 80$  km, (c)  $L = 40$  km, (d)  $L = 20$  km, (e)  $L = 10$  km and (f)  $L = 5$  km.

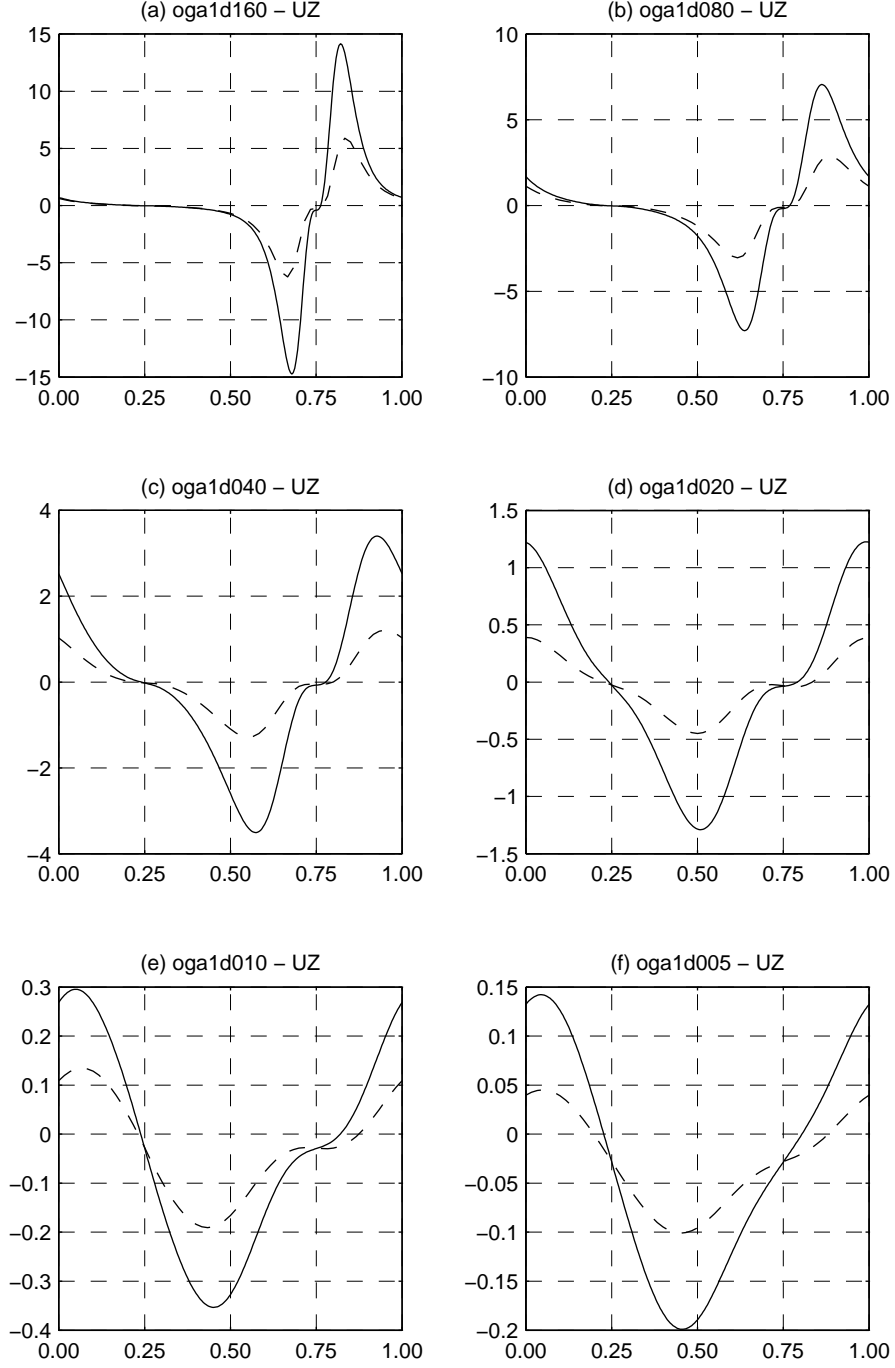

**Fig. 24.** Vertical surface velocity  $u_z(x, z_s)$  for Experiment D (solid line) and  $u_z(x, L/4, z_s)$  for experiment C (dashed line) [ $\text{m s}^{-1}$ ] as a function of the  $\hat{x}$  coordinate for domain lengths **(a)**  $L = 160$  km, **(b)**  $L = 80$  km, **(c)**  $L = 40$  km, **(d)**  $L = 20$  km, **(e)**  $L = 10$  km and **(f)**  $L = 5$  km.

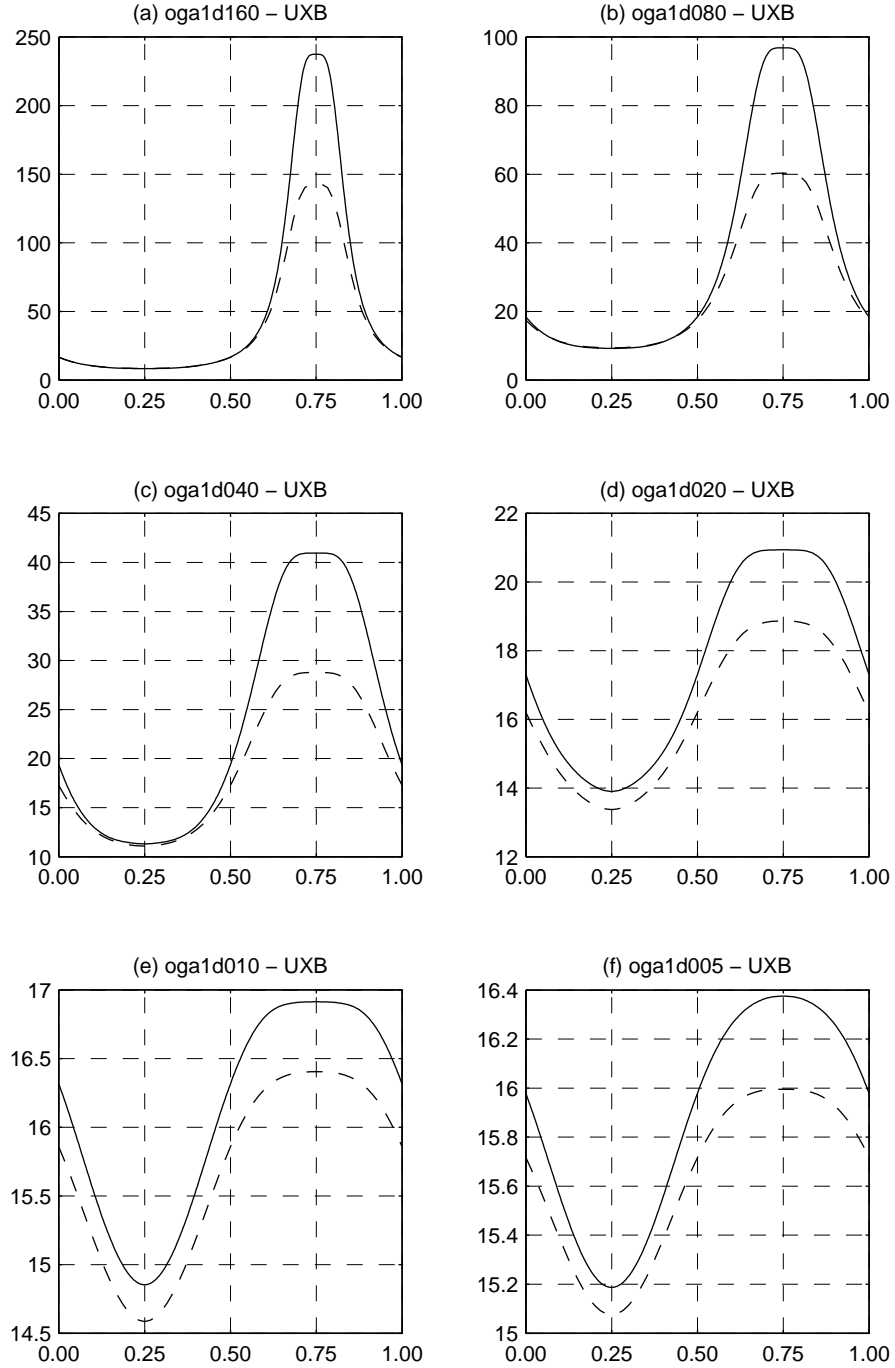

**Fig. 25.** Horizontal bottom velocity  $u_x(x, z_b)$  for Experiment D (solid line) and  $u_x(x, L/4, z_b)$  for experiment C (dashed line) [ $\text{ma}^{-1}$ ] as a function of the  $\hat{x}$  coordinate for domain lengths (a)  $L = 160$  km, (b)  $L = 80$  km, (c)  $L = 40$  km, (d)  $L = 20$  km, (e)  $L = 10$  km and (f)  $L = 5$  km.

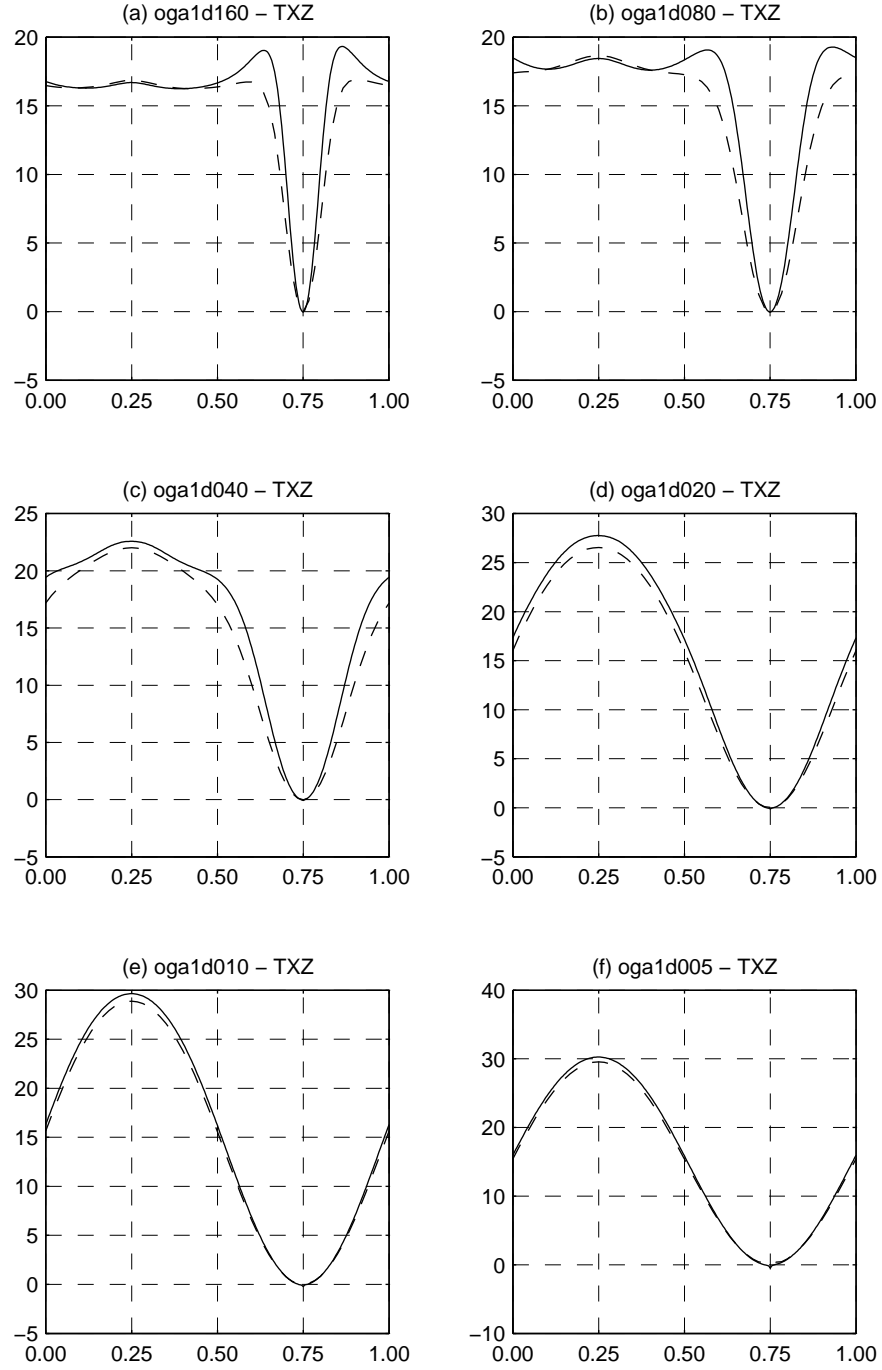

**Fig. 26.** Basal shear stress  $\sigma_{xz}(x, z_b)$  for Experiment D (solid line) and  $\sigma_{xz}(x, L/4, z_b)$  for experiment C (dashed line) [kPa] as a function of the  $\hat{x}$  coordinate for domain lengths **(a)**  $L = 160$  km, **(b)**  $L = 80$  km, **(c)**  $L = 40$  km, **(d)**  $L = 20$  km, **(e)**  $L = 10$  km and **(f)**  $L = 5$  km.

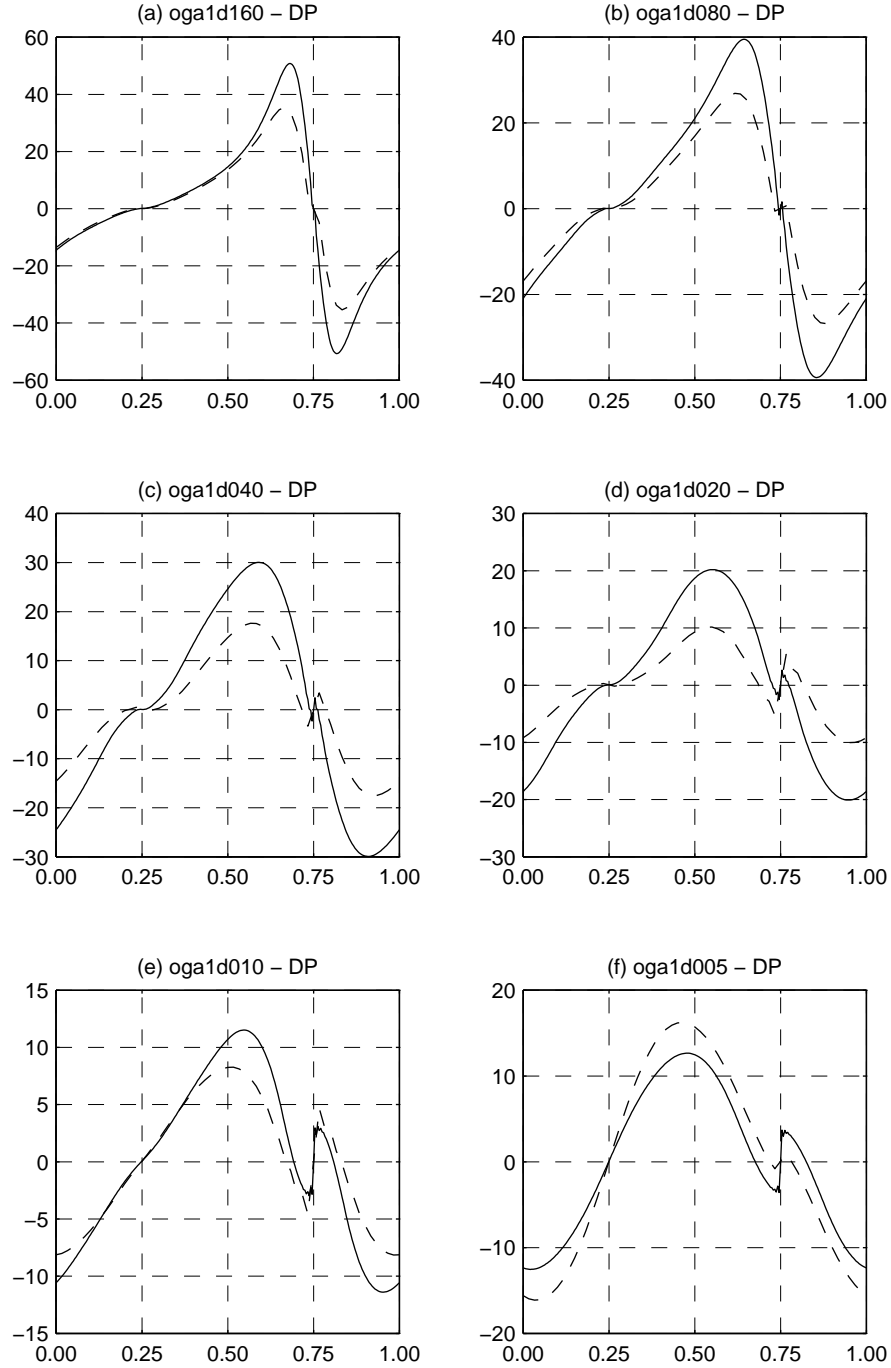

**Fig. 27.** Difference between the isotropic and hydrostatic pressure at the bed  $\Delta p(x, z_b)$  for Experiment D (solid line) and  $\Delta p(x, L/4, z_b)$  for experiment C (dashed line) [kPa] as a function of the  $\hat{x}$  coordinate for domain lengths **(a)**  $L = 160$  km, **(b)**  $L = 80$  km, **(c)**  $L = 40$  km, **(d)**  $L = 20$  km, **(e)**  $L = 10$  km and **(f)**  $L = 5$  km.

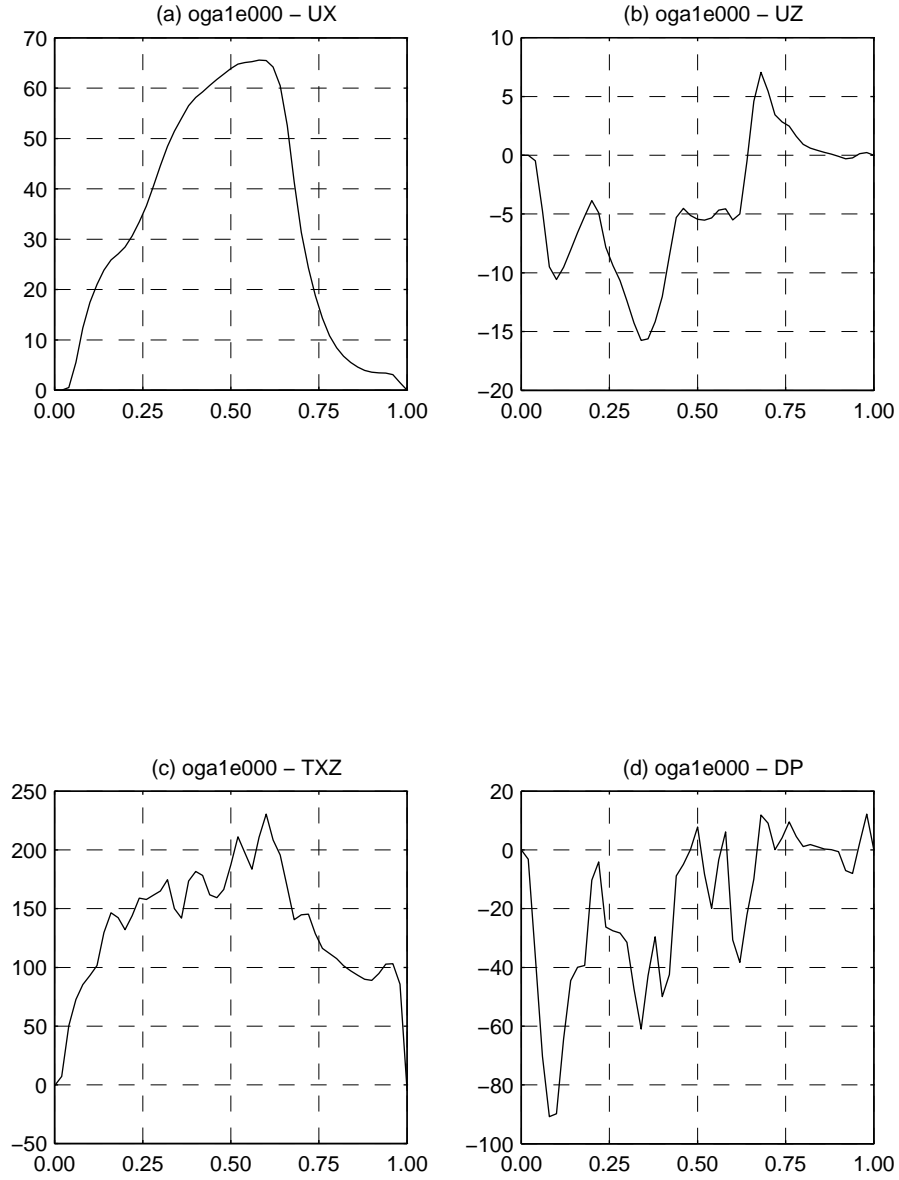

**Fig. 28.** Experiment E000 - **(a)** Horizontal surface velocity  $u_x(z_s)$  [ $\text{ma}^{-1}$ ], **(b)** vertical surface velocity  $u_z(z_s)$  [ $\text{ma}^{-1}$ ], **(c)** basal shear stress  $\sigma_{xz}(z_b)$  [ $\text{kPa}$ ] and **(d)** difference between the isotropic and hydrostatic pressure at the bed  $\Delta p(z_b)$  [ $\text{kPa}$ ] as a function of the horizontal coordinate  $\hat{x}$ .

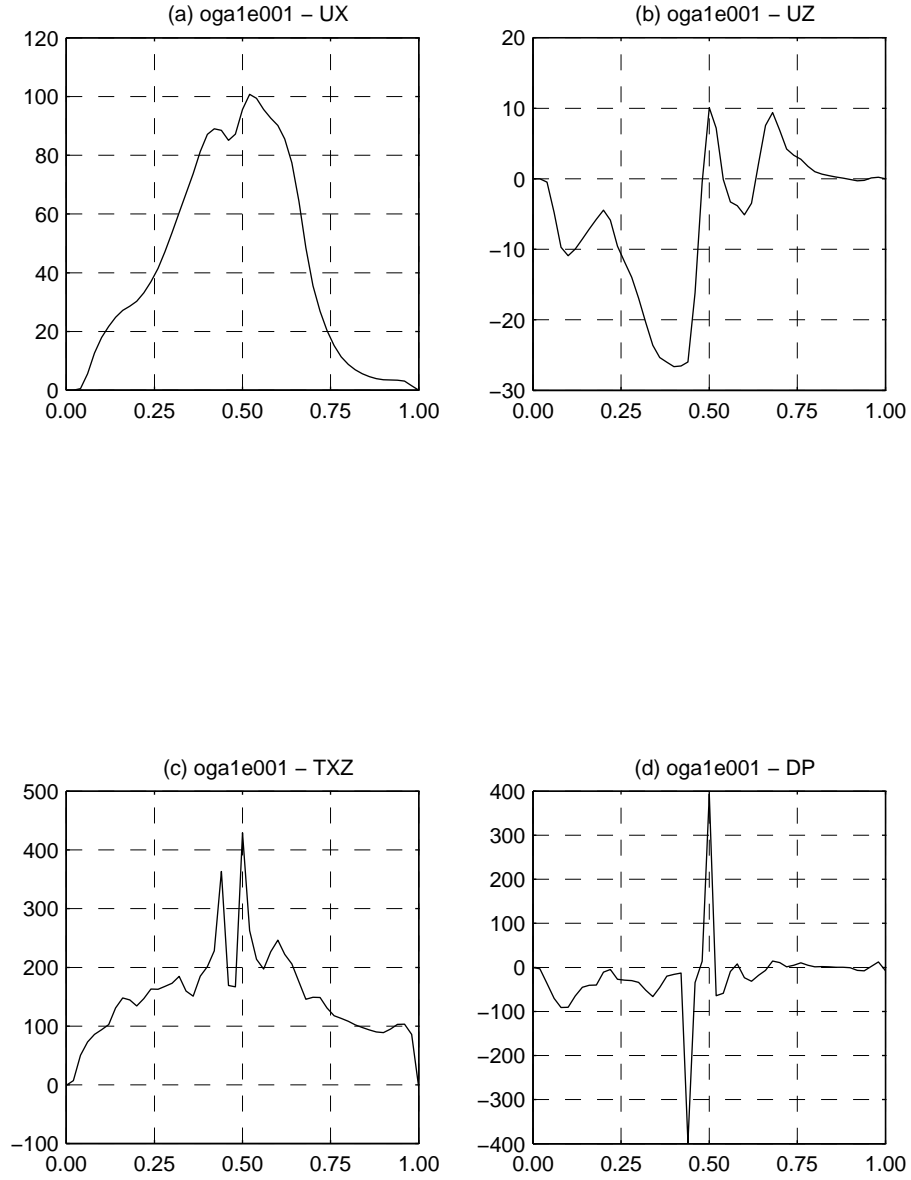

**Fig. 29.** Experiment E001 - **(a)** Horizontal surface velocity  $u_x(z_s)$  [ $\text{ma}^{-1}$ ], **(b)** vertical surface velocity  $u_z(z_s)$  [ $\text{ma}^{-1}$ ], **(c)** basal shear stress  $\sigma_{xz}(z_b)$  [kPa] and **(d)** difference between the isotropic and hydrostatic pressure at the bed  $\Delta p(z_b)$  [kPa] as a function of the horizontal coordinate  $\hat{x}$ .

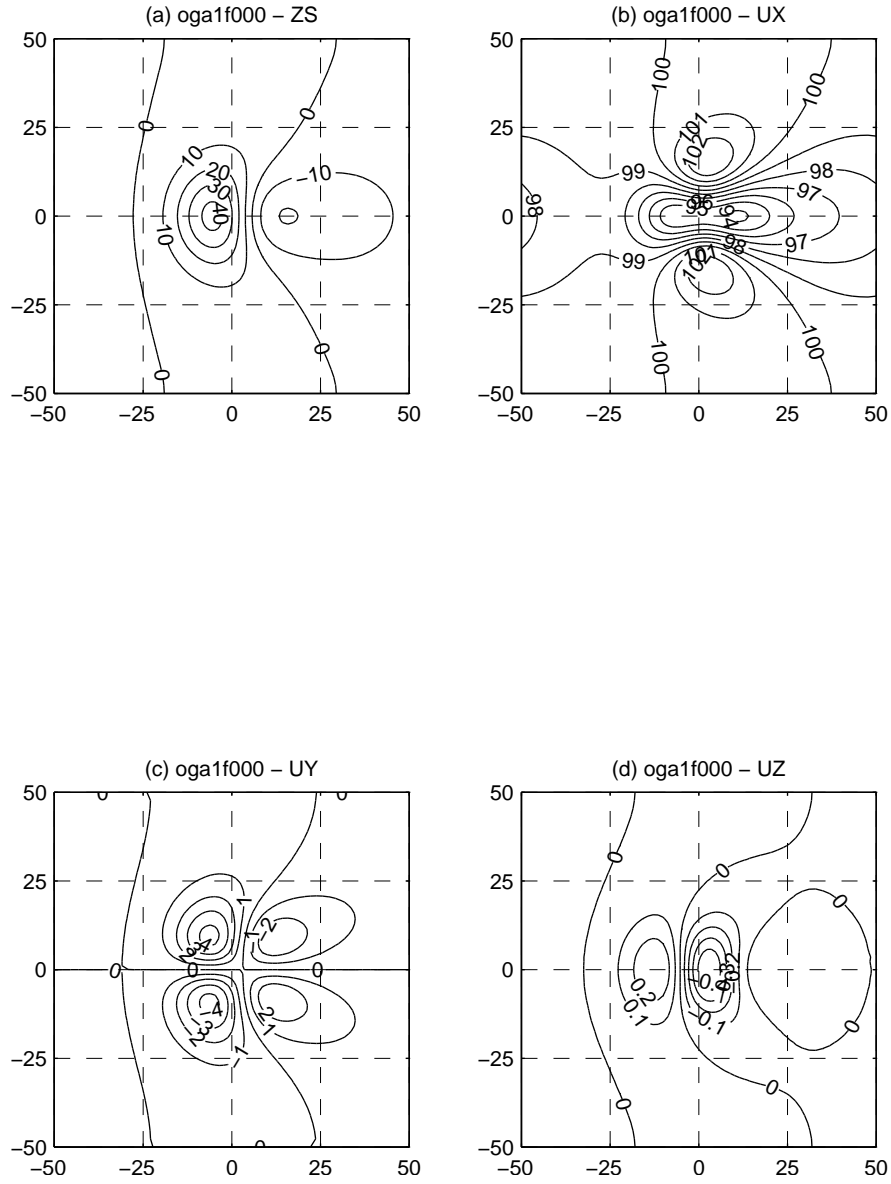

**Fig. 30.** Experiment F000 - (a) Altitude of the free surface  $z_s$  [m] and surface velocity components (b)  $u_x(z_s)$ , (c)  $u_y(z_s)$  and (d)  $u_z(z_s)$  [ $\text{m s}^{-1}$ ] as a function of the horizontal coordinates  $x$  and  $y$ .

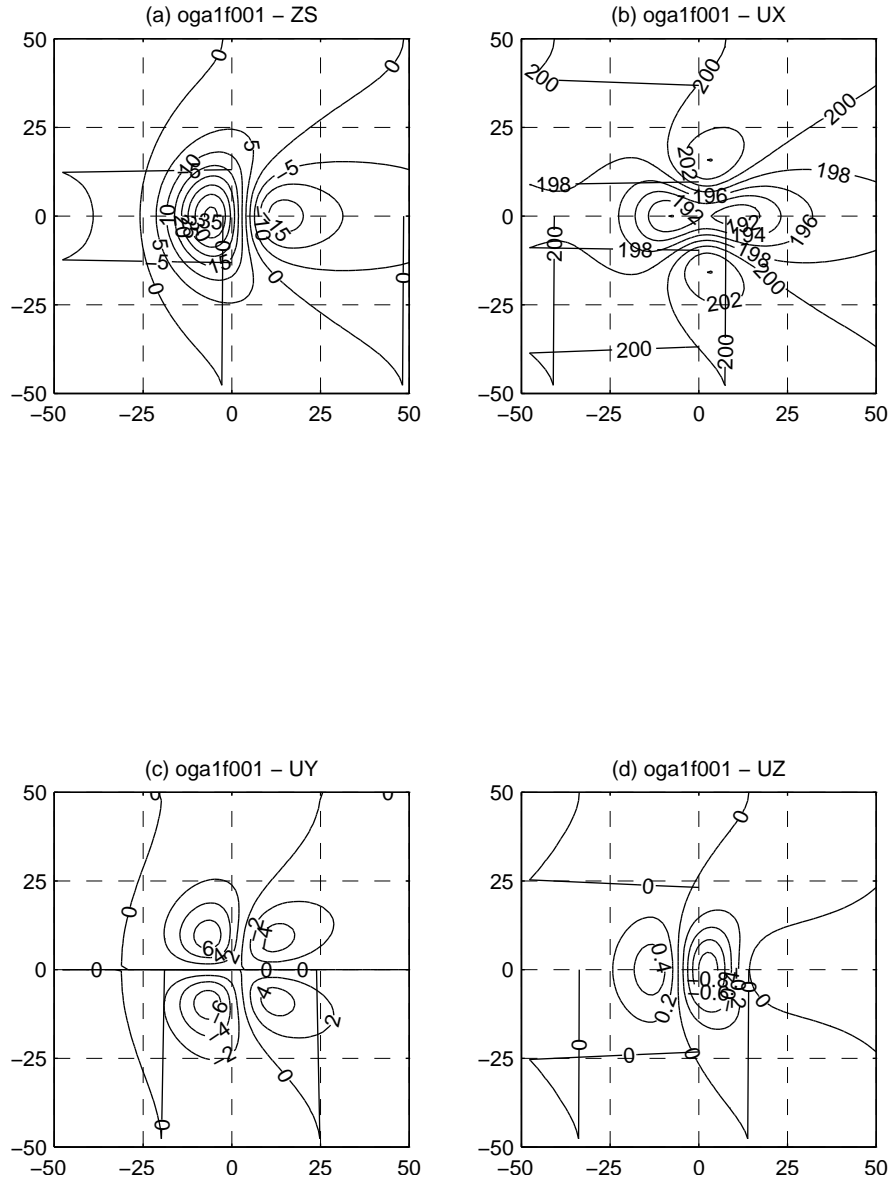

**Fig. 31.** Experiment F001 - (a) Altitude of the free surface  $z_s$  [m] and surface velocity components (b)  $u_x(z_s)$ , (c)  $u_y(z_s)$  and (d)  $u_z(z_s)$  [ $\text{ma}^{-1}$ ] as a function of the horizontal coordinates  $x$  and  $y$ .
